# Supplementary material for: A disulphide bond-mediated hetero-dimer of a hemoprotein and a fluorescent protein exhibiting efficient energy transfer
Source: PubMed Central journal article supplement — RSC Adv. 2022 Oct 6;12(44):28519–24. doi: 10.1039/d2ra05249k (PMC9535469; doi:10.1039/d2ra05249k), 2022-10-06
Supplement: RA-012-D2RA05249K-s002.pdf [file RA-012-D2RA05249K-s002.pdf]

## Supporting Information

# **Disulphide bond-mediated hetero-dimer of a hemoprotein and a fluorescent protein exhibiting efficient energy transfer**

Julian Wong Soon,<sup>a</sup> Koji Oohora,<sup>a</sup> Takashi Hayashi<sup>a</sup>

<sup>a</sup>Department of Applied Chemistry, Graduate School of Engineering, Osaka University, Suita, 565-0871, Japan

### Table of Contents

|    |                            |     |
|----|----------------------------|-----|
| 1. | General Information.....   | S2  |
| 2. | General Procedures.....    | S3  |
| 3. | Supplementary Figures..... | S4  |
| 4. | Reference.....             | S12 |

## 1. General Information

### 1.1 Materials and Methods

Instruments: MALDI-TOF MS analyses were performed with an Autoflex III mass spectrometer. UV-Vis spectra were measured with a Shimadzu BioSpec-nano or Shimadzu UV-3600 plus double-beam spectrometer. Luminescence spectra were measured with a JASCO FP-8600 fluorescence spectrometer. Size exclusion chromatographic (SEC) analyses were performed with an ÄKTA Purifier System (GE Healthcare) at 4 °C. Fluorescence lifetimes were measured by a C10196 Hamamatsu picosecond light pulser equipped with a C9300 Hamamatsu digital camera and laser excitation by a Hamamatsu laser beam (M10306-33 model): peak wavelength = 464 nm, laser power = 119 mW, typical pulse width = 70 ns. The pH measurements were carried out with an F-25 Horiba pH meter.

Materials: NEBuilder HiFi DNA Assembly kit, ampicillin sodium salt, isopropyl-β-D-1-thiogalactopyranoside (IPTG), Trizma base, ethylenediaminetetraacetic acid (EDTA), desthiobiotin, Strep-Tactin Superflow resins, dithiothreitol (DTT), dimethyl sulfoxide (DMSO), 2,2'-dithiodipyridine, bromophenol blue, acrylamide, glycerol, tetramethylethylenediamine (TEMED), ammonium persulfate (APS), Tricine, Coomassie Brilliant blue G-250, sodium dodecyl sulfate (SDS), and Novex Sharp prestained protein standard were purchased and used as received. Unless mentioned otherwise, all protein solutions were dissolved in a 100 mM potassium phosphate buffer (pH 7.0). Deionized water was prepared using a Millipore Integral apparatus.

### 1.2 Protein Sequence of Cytochrome *b*<sub>562</sub> mutants

Cyt *b*<sub>562</sub><sup>wt</sup>

ADLEDNMETLNDNLKVIEKADNAAQVKDALTKMRAAALDAQKATPPKLEDKSPDSEPMKDFR  
HGFIDILVGQIDDALKLANEGKVKEAQAAAEQLKTTRNAYHQKYR

Cyt *b*<sub>562</sub><sup>K15C</sup>

ADLEDNMETLNDNLCVIEKADNAAQVKDALTKMRAAALDAQKATPPKLEDKSPDSEPMKDFR  
HGFIDILVGQIDDALKLANEGKVKEAQAAAEQLKTTRNAYHQKYR

Cyt *b*<sub>562</sub><sup>H63C</sup>

ADLEDNMETLNDNLKVIEKADNAAQVKDALTKMRAAALDAQKATPPKLEDKSPDSEPMKDFR  
CGFDILVGQIDDALKLANEGKVKEAQAAAEQLKTTRNAYHQKYR

Cyt *b*<sub>562</sub><sup>N80C</sup>

ADLEDNMETLNDNLKVIEKADNAAQVKDALTKMRAAALDAQKATPPKLEDKSPDSEPMKDFR  
HGFIDILVGQIDDALKLACEGKVKEAQAAAEQLKTTRNAYHQKYR

Cyt *b*<sub>562</sub><sup>A100C</sup>

ADLEDNMETLNDNLKVIEKADNAAQVKDALTKMRAAALDAQKATPPKLEDKSPDSEPMKDFR  
HGFIDILVGQIDDALKLANEGKVKEAQAAAEQLKTTRNCYHQKYR

### 1.3 Protein Sequence of GFP mutants

GFP<sup>wt</sup>

SKGEELFTRVVPILVELDGDVNGHKFSVSGEGEGDATYGKLTCLKFICTTGKLPVPWPPTLVT  
TLYSGVQCFSRYPDHMKRHDFFKSAMPEGYVQERTIFFKDDGNYKTRAEVKFEGDTLVNR  
IELKGVDFKEDGNILGHKLEYNYNSHNVYIMADKQKNGIKANFKVRHNIEDGCVQLADHY  
QQNTPIGDGPVLLPDNHYLSTQSALS KDPNEKRDHMLLEFVTAAGITHGMDELYK

GFP<sup>K25C</sup>

SKGEELFTRVVPILVELDGDVNGHCFSVSGEGEGDATYGKLTCLKFIATTGKLPVPWPPTLVT  
TLYSGVQAFSRYPDHMKRHDFFKSAMPEGYVQERTIFFKDDGNYKTRAEVKFEGDTLVNR  
IELKGVDFKEDGNILGHKLEYNYNSHNVYIMADKQKNGIKANFKVRHNIEDGCVQLADHY  
QQNTPIGDGPVLLPDNHYLSTQSALS KDPNEKRDHMLLEFVTAAGITHGMDELYK

GFP<sup>S174C</sup>

SKGEELFTRVVPILVELDGDVNGHKFSVSGEGEGDATYGKLTCLKFIATTGKLPVPWPPTLVT  
TLYSGVQAFSRYPDHMKRHDFFKSAMPEGYVQERTIFFKDDGNYKTRAEVKFEGDTLVNR  
IELKGVDFKEDGNILGHKLEYNYNSHNVYIMADKQKNGIKANFKVRHNIEDGCVQLADHY  
QQNTPIGDGPVLLPDNHYLSTQSALS KDPNEKRDHMLLEFVTAAGITHGMDELYK

## 2. General Procedures

### 2.1 Preparation of Cyt *b*<sub>562</sub> and GFP mutants

The pUC118 gene expression systems and purification used to obtain Cyt *b*<sub>562</sub> mutants were reported in our previous works.<sup>1</sup> The expression of GFP mutants were carried out using the pET-21b(+) expression system containing a Strep-tag II gene for the purification step. First, a gene for GFP was inserted into a pET-21b(+) vector containing the Step-tactin sequence. An insert encoding the GFP gene was amplified by PCR using a pEX-A2J2 plasmid (Eurofin Genomics Co., Ltd) as a template. The PCR products were then treated with *Dpn*I restriction enzymes (New England Biolabs Japan), purified by agarose gel electrophoresis, and assembled with a linearized pET-21b(+) vector using NEBuilder HiFi DNA Assembly. The assembled products were transformed into chemically competent *E. coli* DH5 $\alpha$  cells to afford a plasmid encoding GFP. DNA sequencing of purified plasmids verified the correct insertion of the gene sequence into the expression vector. The resulting expression plasmid was transformed into *E. coli* BL21(DE3) competent cells. A LB medium (1 L) containing ampicillin (100 mg) was inoculated with 10 mL of the culture (OD = 0.5) of the relevant transformed cells. After the cells were grown aerobically with vigorous shaking at 37 °C until the OD<sub>600</sub> reached 0.5–0.7, IPTG was added to a final concentration of 0.5 mM to induce the protein expression. The incubation was continued at 37 °C overnight. The cells were harvested by centrifugation at 8000  $\times$ g for 10 min at 4 °C and re-suspended in a 20 mL of a 10 mM Tris-HCl buffer (pH 8.0) containing 1 mM EDTA and lysed by freeze-thaw cycles with subsequent sonication for 20 sec  $\times$  10 times at 4 °C. The lysate was centrifuged at 10000 rpm for 10 mins and the supernatant was

applied to a Strep-tag column. The elution of purified recombinant protein was performed by addition of 2.5 mM desthiobiotin prepared in 10 mM Tris-HCl buffer (pH 8.0) containing 1 mM EDTA.

## **2.2 SEC Analysis**

The analyses were performed using a Superdex 75 Increase 10/300 GL (GE Healthcare) column with a flow rate of 0.5 mL/min at 4 °C with monitoring of the absorbance at 418 nm, 395 nm, and/or 280 nm for detection. The 100 mM potassium phosphate buffer containing 300 mM NaCl pH 7.0 was used as an elution buffer.

## **2.3 Non-reducing SDS-PAGE Analysis**

Equal volumes of purified samples were mixed with 2X SDS-PAGE sample buffer containing 10% sucrose, 4% SDS, 125 mM Tris-HCl, and 0.005% Bromophenol blue and incubated at 90 °C for 5 min. After incubation, samples were cooled to room temperature and 10 µL of each aliquot was loaded into wells of pre-cast with separating gel consisting of 14% (v/v) acrylamide, 33% (v/v) gel buffer, 13% (v/v) glycerol, 0.07% (v/v) APS, and 0.2% (v/v) TEMED and a stacking gel consisting of 4% (v/v) acrylamide, 25% (v/v) gel buffer, 0.25% (v/v) APS, and 0.3% (v/v) TEMED. Gel buffer stock used for gel preparations composition; 0.01 M SDS, and 3 M Trizma base in 1 L.

The buffer solutions stock contained 100 mM Tricine, 100 mM Trizma base in 1 L (upper cassette) and 200 mM Trizma base in 1 L, pH 8.9 (lower cassette). The electrophoresis was run for 60 min, 150 V, 120 mA, 18W. The gel was stained with a staining solution containing 0.06% Coomassie Brilliant Blue G-250, 10% (v/v) acetic acid in 1 L for 12 h and destained by a decolorizing solution containing 10% (v/v) acetic acid in 1 L for 6 h.

## Supplementary Figures

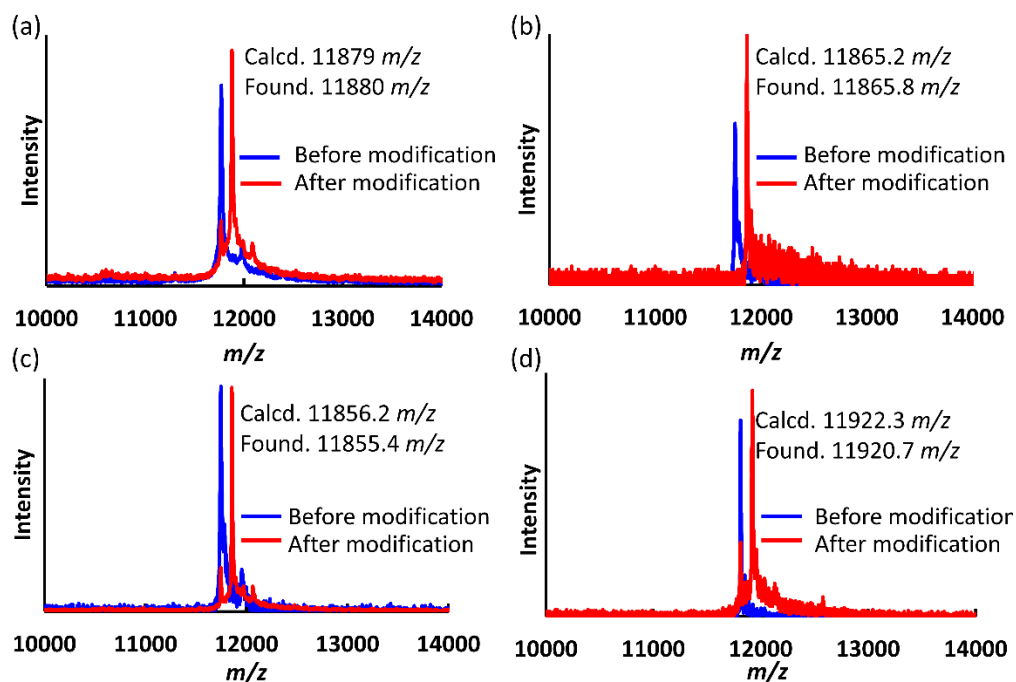

**Fig. S1** MALDI-TOF mass spectra of Cyt  $b_{562}$  mutants before and after modification by 2,2'-dithiodipyridine. (a) Cyt  $b_{562}^{N80C}$ , (b) Cyt  $b_{562}^{K15C}$ , (c) Cyt  $b_{562}^{H63C}$ , and (d) Cyt  $b_{562}^{A100C}$ .

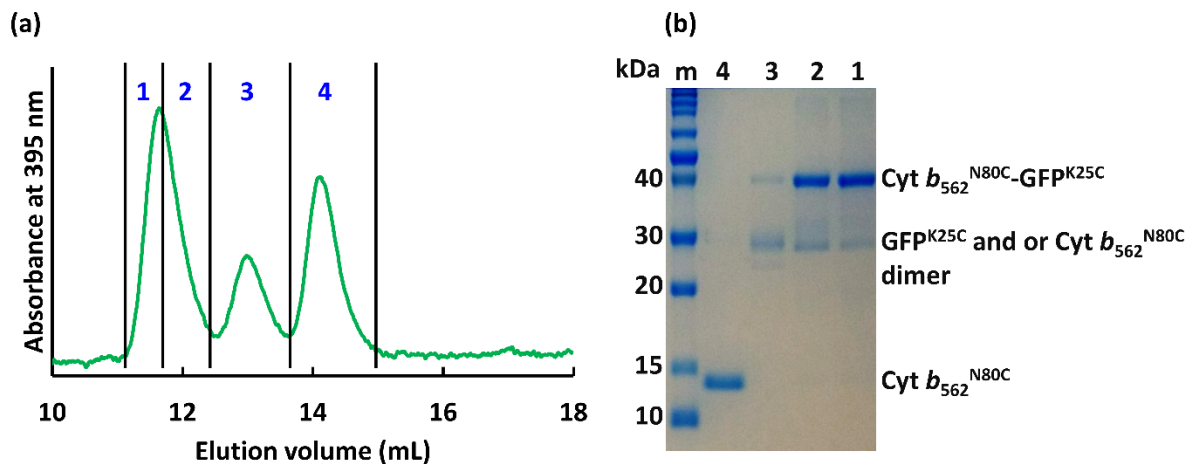

**Fig. S2** (a) Fractionation of the Cyt  $b_{562}^{N80C}$  conjugated with GFP $^{K25C}$  hetero-dimer by Superdex 75 Increase 10/300 GL column resulting in four fractions. (b) Non-reducing SDS-PAGE analysis of fractions 1–4 corresponding to the collected fractions labeled in (a).

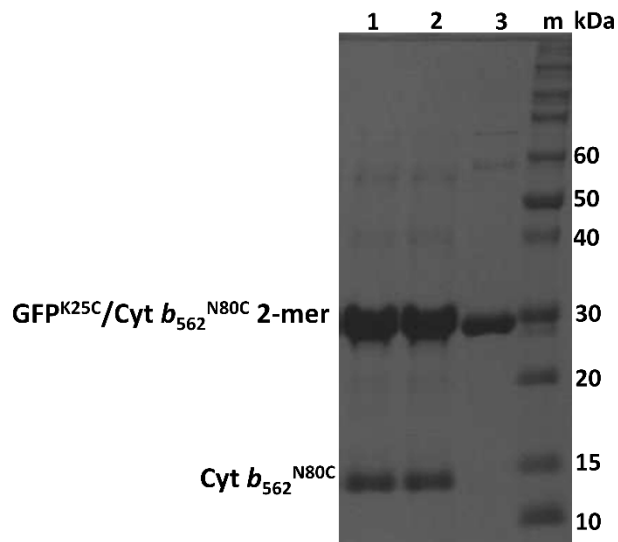

**Fig. S3** Non-reducing SDS-PAGE for samples obtained by conjugation of reduced Cyt  $b_{562}^{N80C}$  and reduced GFP $^{K25C}$  in Lane 1 = 2 : 1 (Cyt  $b_{562}^{N80C}$  : GFP $^{K25C}$ ), Lane 2 = 3 : 1 (Cyt  $b_{562}^{N80C}$  : GFP $^{K25C}$ ), control GFP $^{K25C}$  in Lane 3.

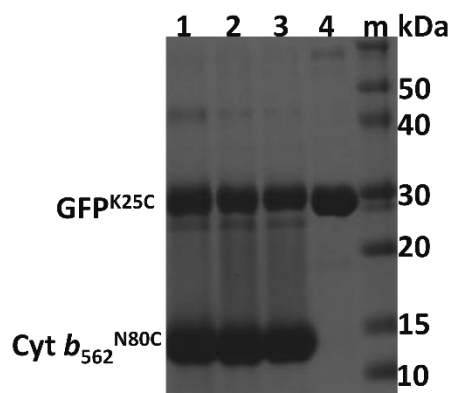

**Fig. S4** Reducing SDS-PAGE of hetero-dimers. Samples were prepared by DTT-containing SDS buffer. Lane 1: Cyt  $b_{562}^{N80C}$ -GFP $^{K25C}$ , Lane 2: Cyt  $b_{562}^{H63C}$ -GFP $^{K25C}$ , Lane 3: Cyt  $b_{562}^{K15C}$ -GFP $^{K25C}$ , and GFP $^{K25C}$  control in Lane 4.

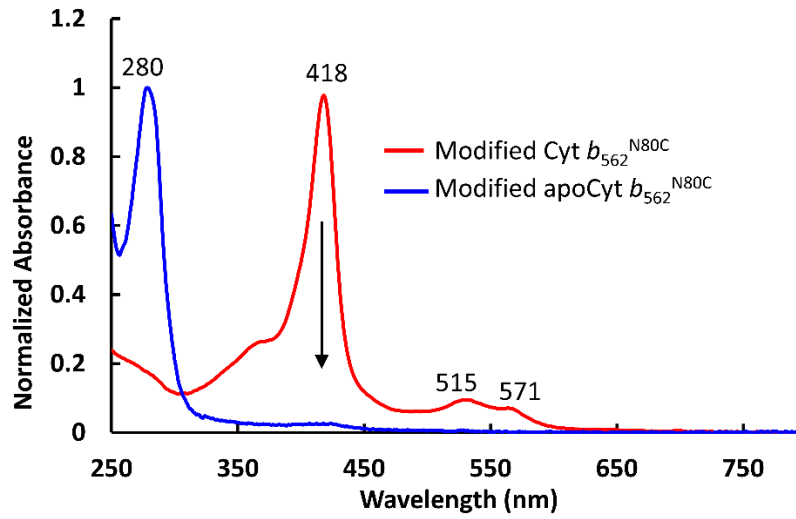

**Fig. S5** UV-Vis spectra of modified Cyt  $b_{562}^{N80C}$  (red) and modified apoCyt  $b_{562}^{N80C}$  after heme removal (blue).

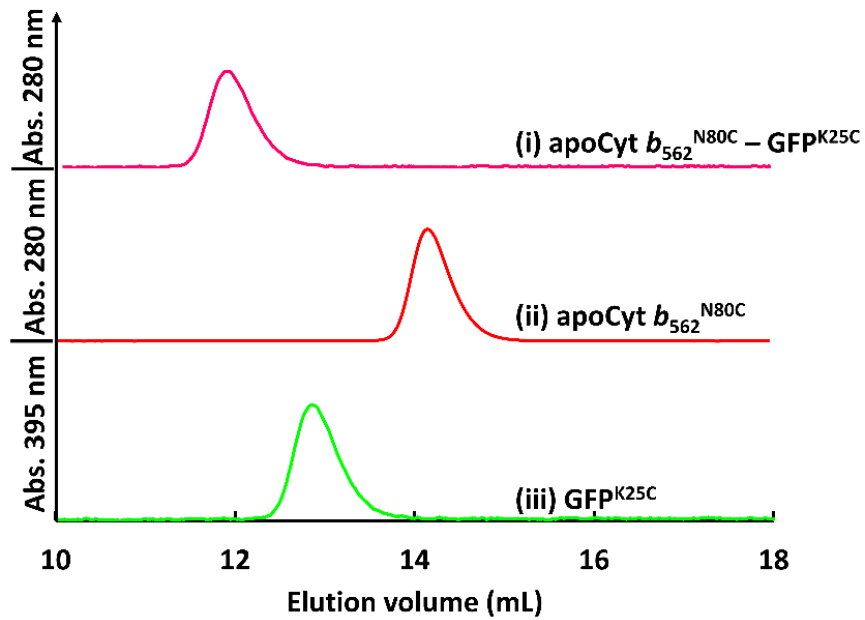

**Fig. S6** SEC traces of apoCyt  $b_{562}^{N80C}$ -GFP<sup>K25C</sup>, apoCyt  $b_{562}^{N80C}$ , and GFP<sup>K25C</sup> using Superdex 75 Increase 10/300 GL column.

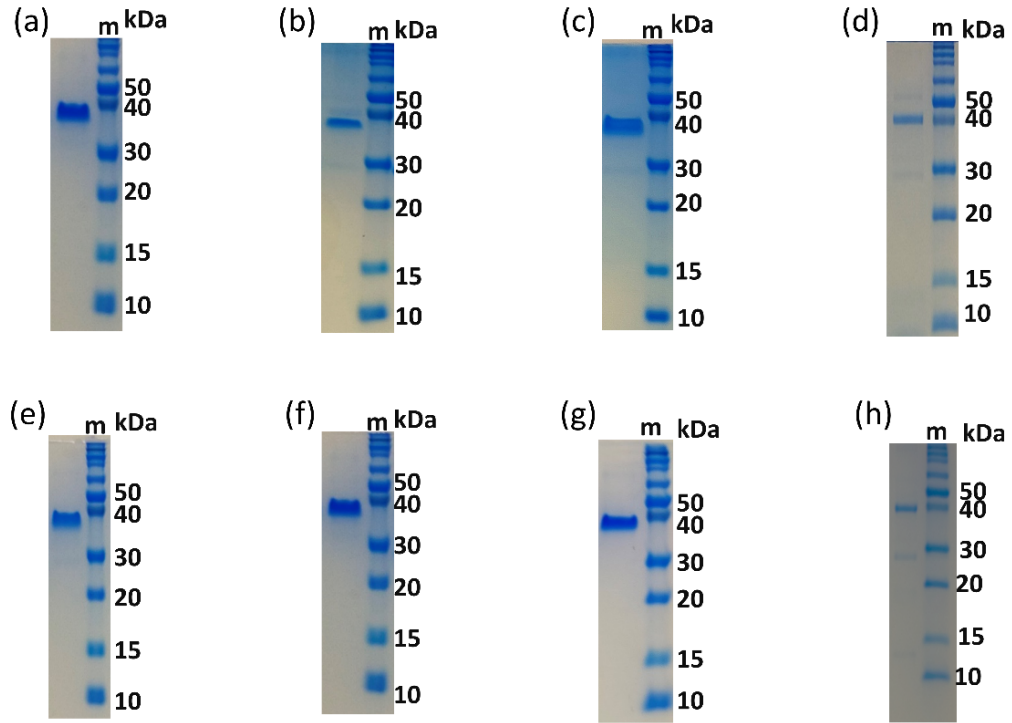

**Fig. S7** Non-reducing SDS PAGE of purified hetero-dimers of (a) Cyt  $b_{562}^{A100C}$ -GFP $^{K25C}$ , (b) Cyt  $b_{562}^{H63C}$ -GFP $^{K25C}$ , (c) Cyt  $b_{562}^{K15C}$ -GFP $^{K25C}$ , (d) Cyt  $b_{562}^{N80C}$ -GFP $^{K25C}$ , (e) Cyt  $b_{562}^{A100C}$ -GFP $^{S174C}$ , (f) Cyt  $b_{562}^{H63C}$ -GFP $^{S174C}$ , (g) Cyt  $b_{562}^{K15C}$ -GFP $^{S174C}$ , and (h) Cyt  $b_{562}^{N80C}$ -GFP $^{S174C}$ .



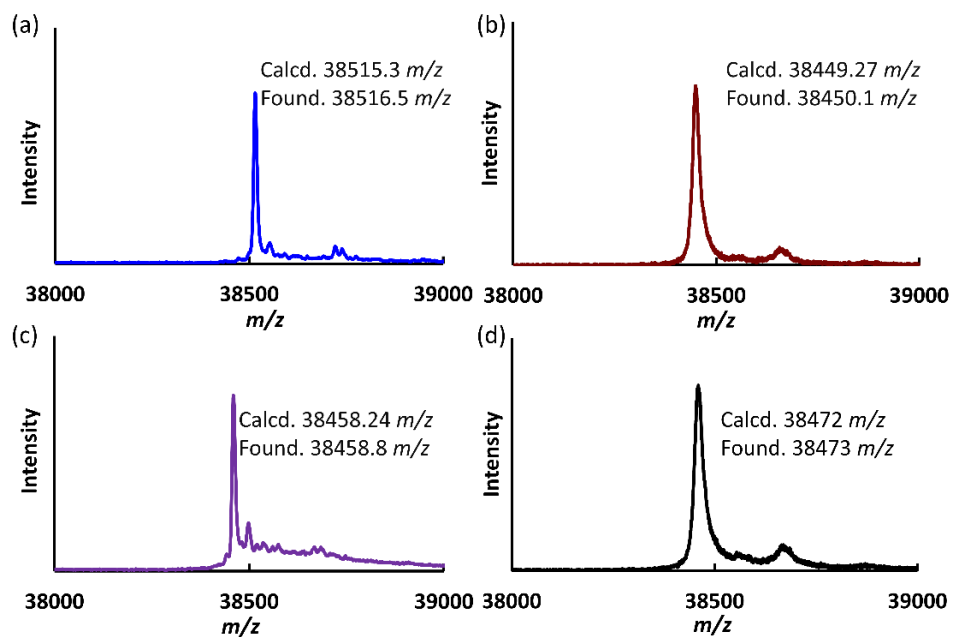

**Fig. S8** MALDI-TOF mass spectra of purified hetero-dimers of (a) Cyt  $b_{562}^{A100C}$ -GFP<sup>K25C</sup>, (b) Cyt  $b_{562}^{H63C}$ -GFP<sup>K25C</sup>, (c) Cyt  $b_{562}^{K15C}$ -GFP<sup>K25C</sup> and (d) Cyt  $b_{562}^{N80C}$ -GFP<sup>K25C</sup>.

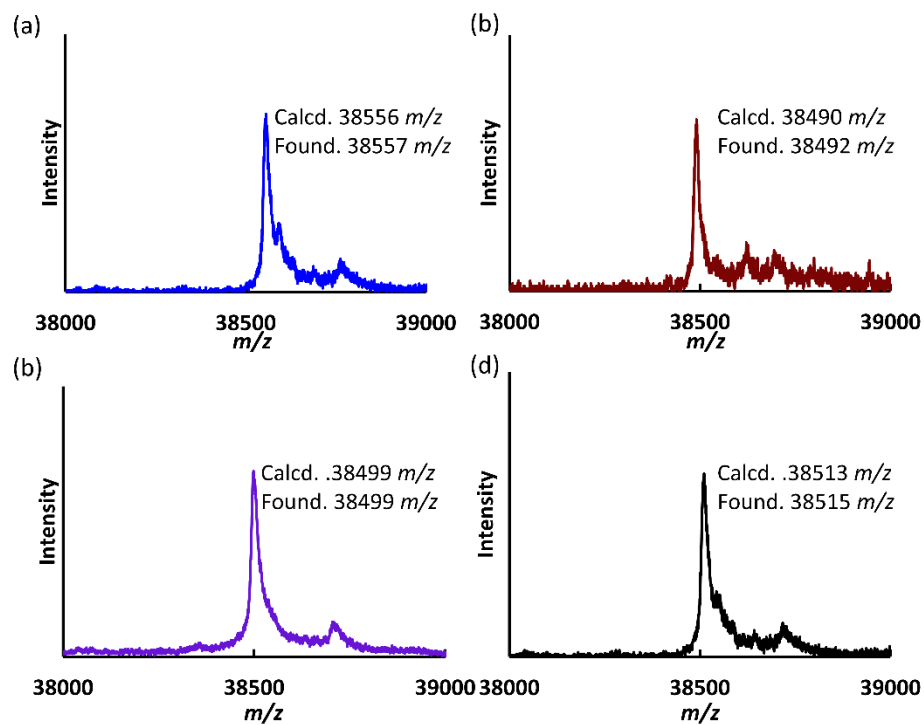

**Fig. S9** MALDI-TOF mass spectra of purified hetero-dimers of (a) Cyt  $b_{562}^{A100C}$ -GFP<sup>S174C</sup>, (b) Cyt  $b_{562}^{H63C}$ -GFP<sup>S174C</sup>, (c) Cyt  $b_{562}^{K15C}$ -GFP<sup>S174C</sup> and (d) Cyt  $b_{562}^{N80C}$ -GFP<sup>S174C</sup>.

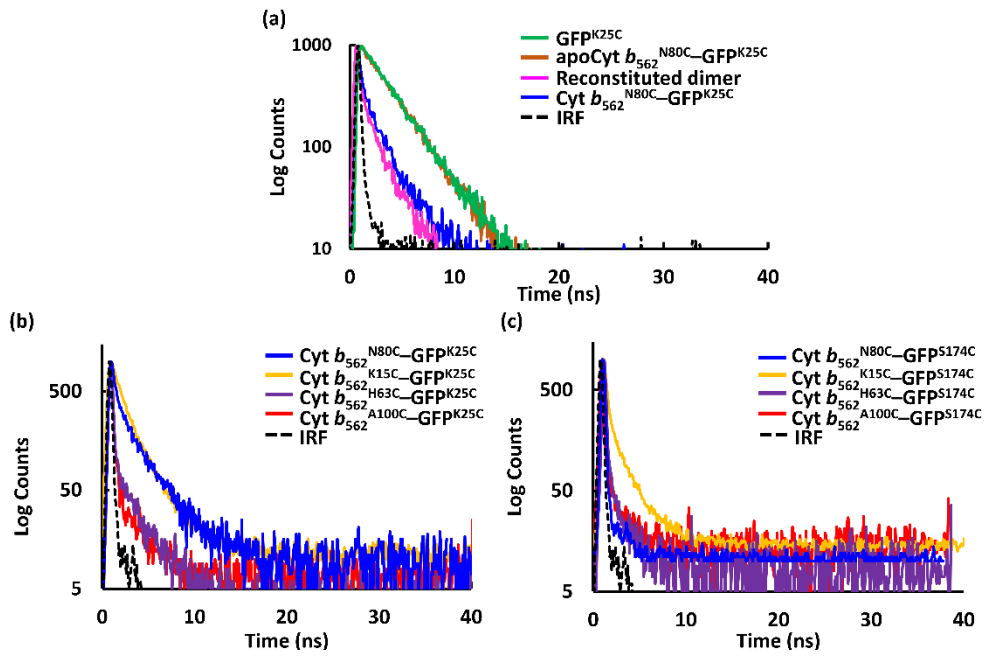

**Fig. S10** Full scale of the fluorescence lifetime measurements (Fig. 4 in main text).

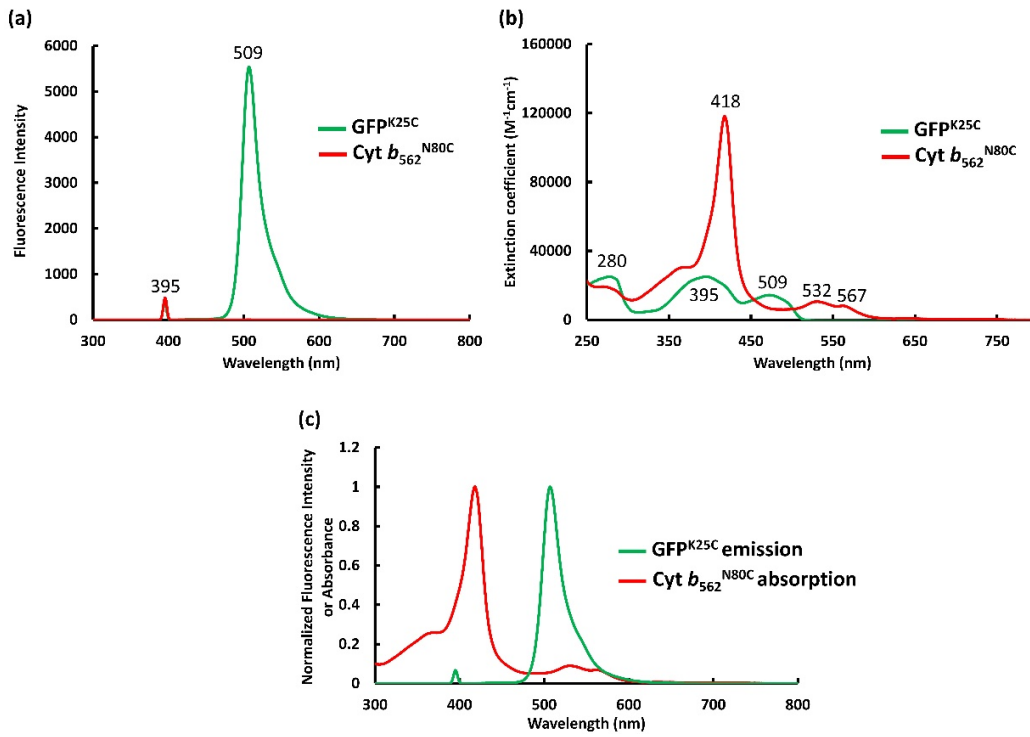

**Fig. S11** (a) Fluorescence spectra of GFP<sup>K25C</sup> and Cyt b<sub>562</sub><sup>N80C</sup>  $\lambda_{ex} = 395$  nm. (b) UV-vis spectra of GFP<sup>K25C</sup> and Cyt b<sub>562</sub><sup>N80C</sup>. (c) Emission spectrum of GFP<sup>K25C</sup> and absorption spectrum of Cyt b<sub>562</sub><sup>N80C</sup>.

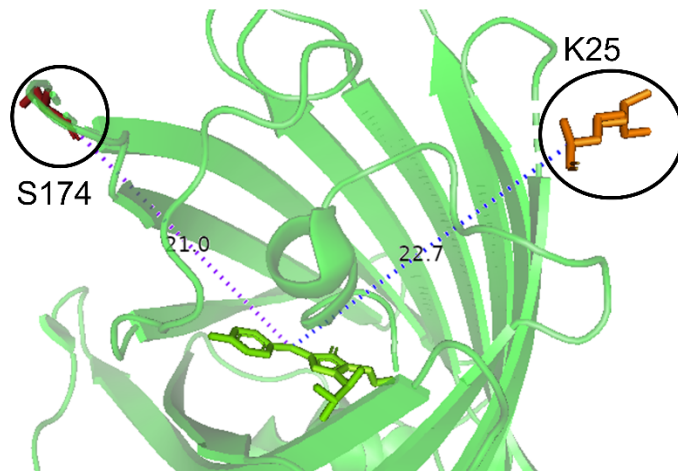

**Fig. S12** Estimated distances of K25 = 22.7 Å, and S174 = 21.0 Å to GFP chromophore by PyMol.

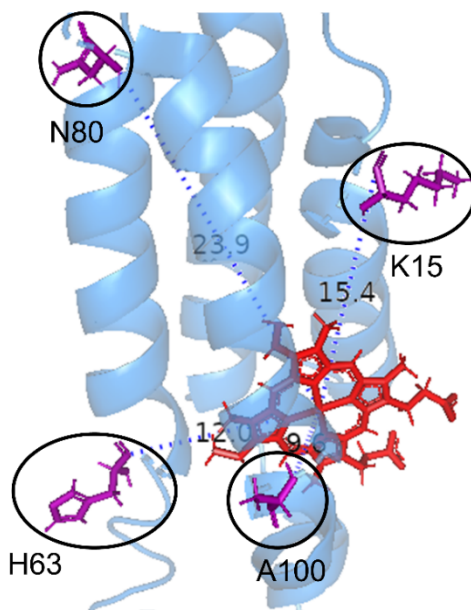

**Fig. S13** Estimated distances of N80 = 23.9 Å, K15 = 15.4 Å, H63 = 12.0 Å, and A100 = 9.6 Å to the Cyt *b*<sub>562</sub> heme centre by PyMol.

## Reference

1. H. Kitagishi, K. Oohora, H. Yamaguchi, H. Sato, T. Matsuo, A. Harada, T. Hayashi, *J. Am. Chem. Soc.*, 2007, **129**, 10326–10327.
