# Supplementary figures and images for: A disulphide bond-mediated hetero-dimer of a hemoprotein and a fluorescent protein exhibiting efficient energy transfer
Source: PubMed Central journal article supplement — RSC Adv. 2022 Oct 6;12(44):28519–24. doi: 10.1039/d2ra05249k (PMC9535469; doi:10.1039/d2ra05249k), 2022-10-06

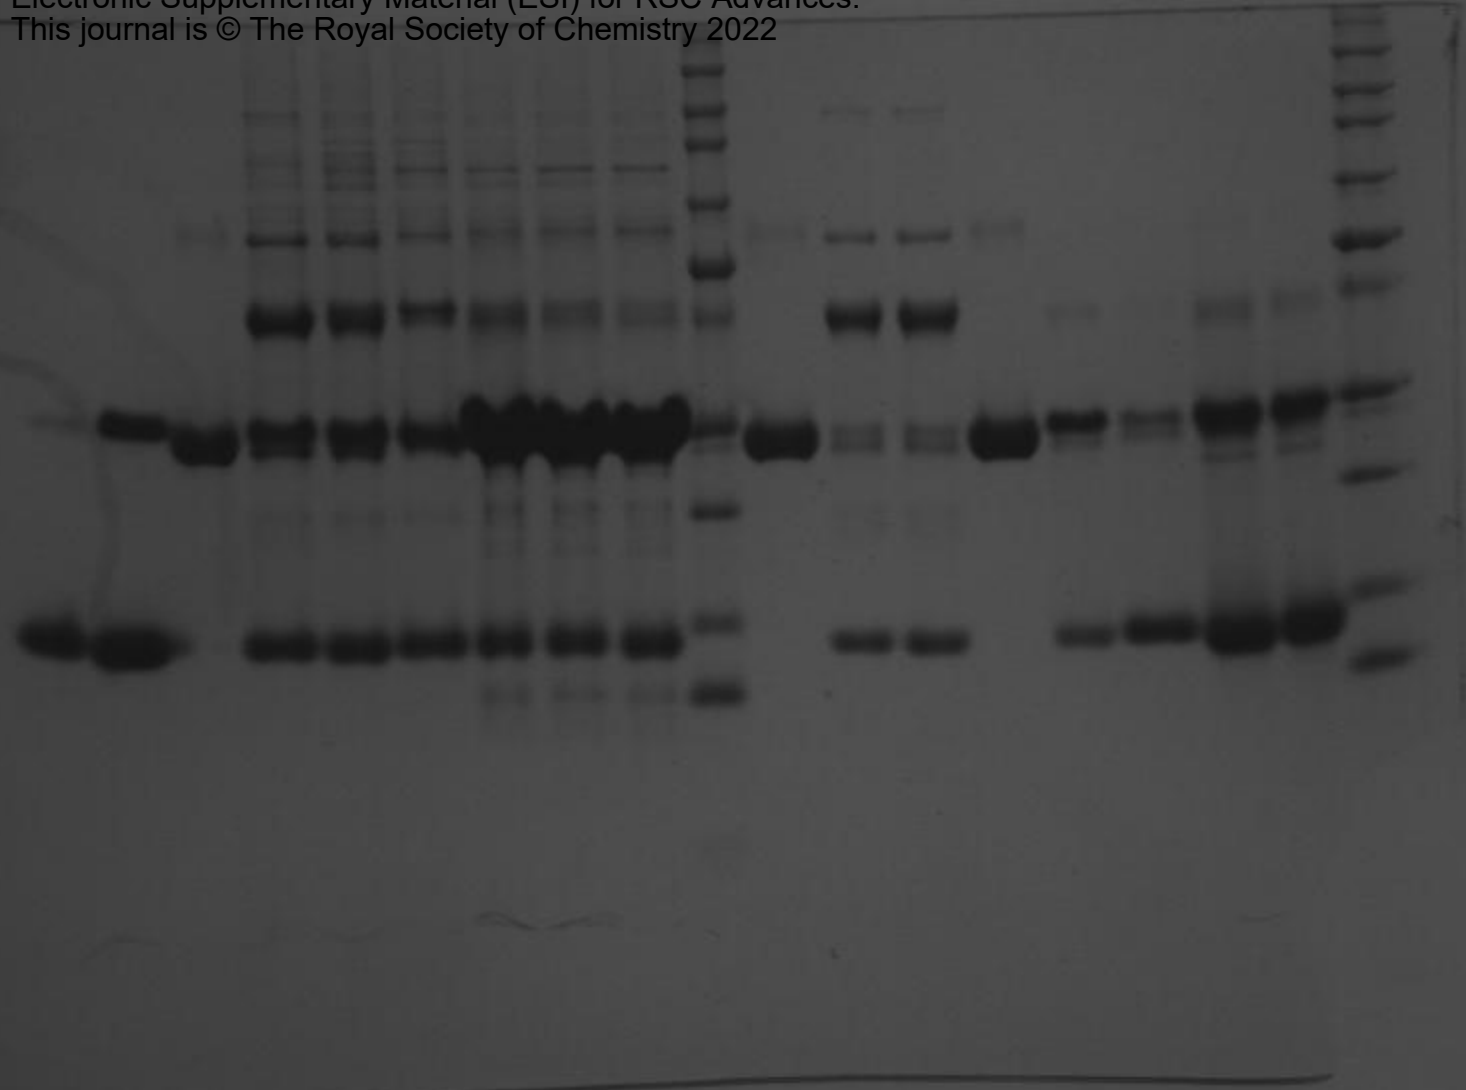

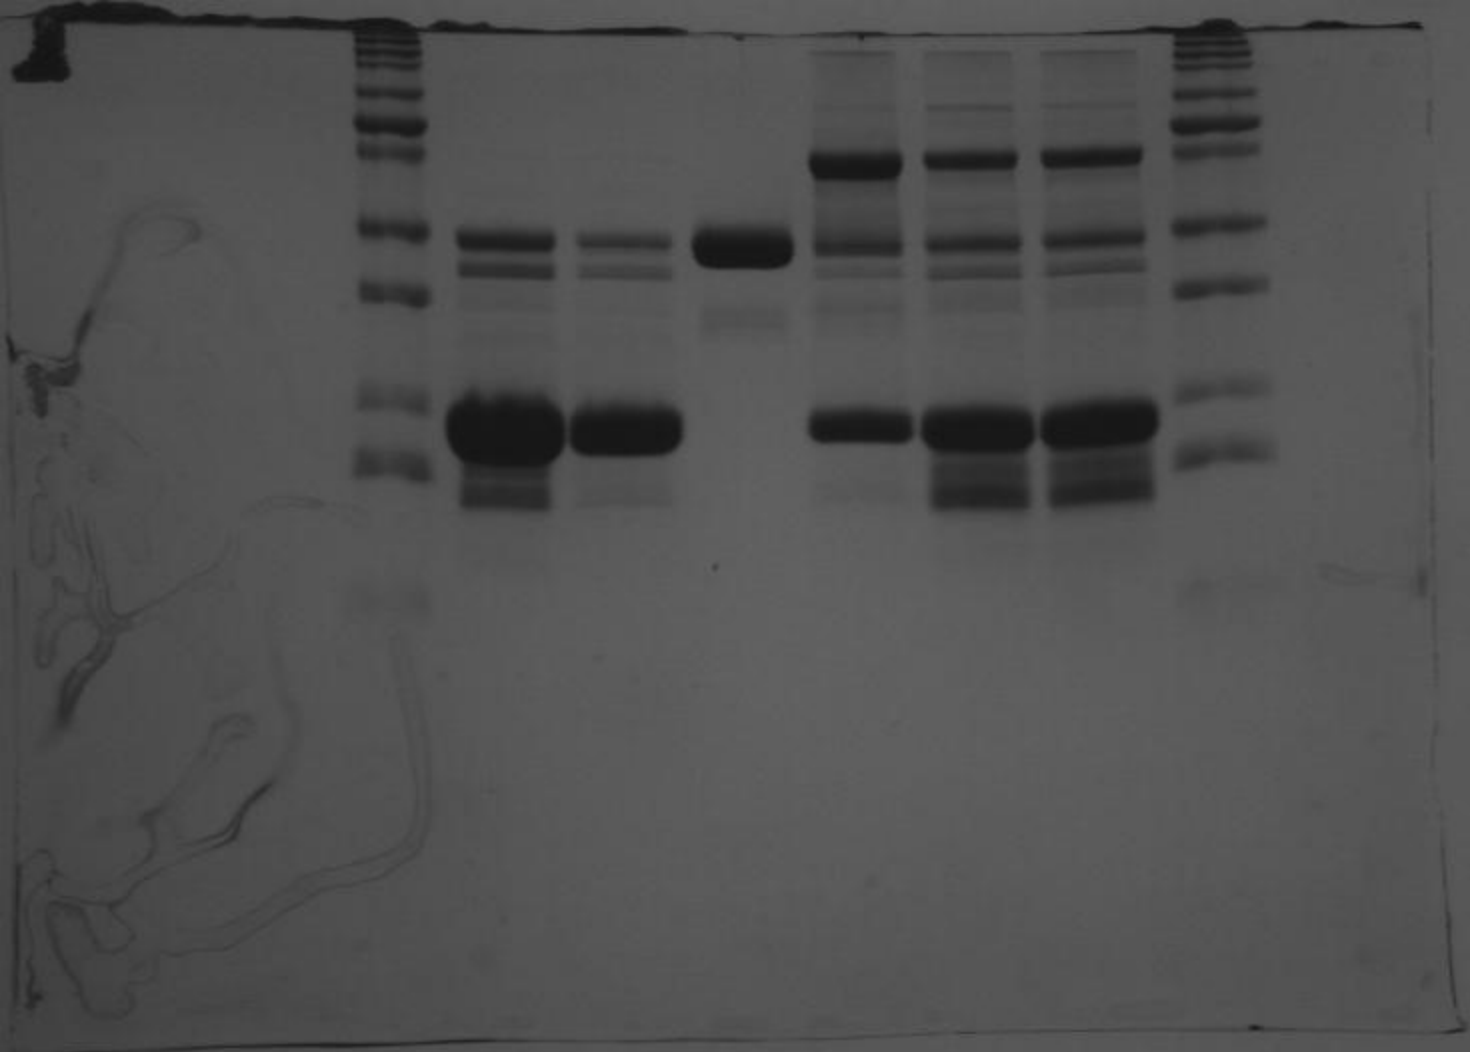

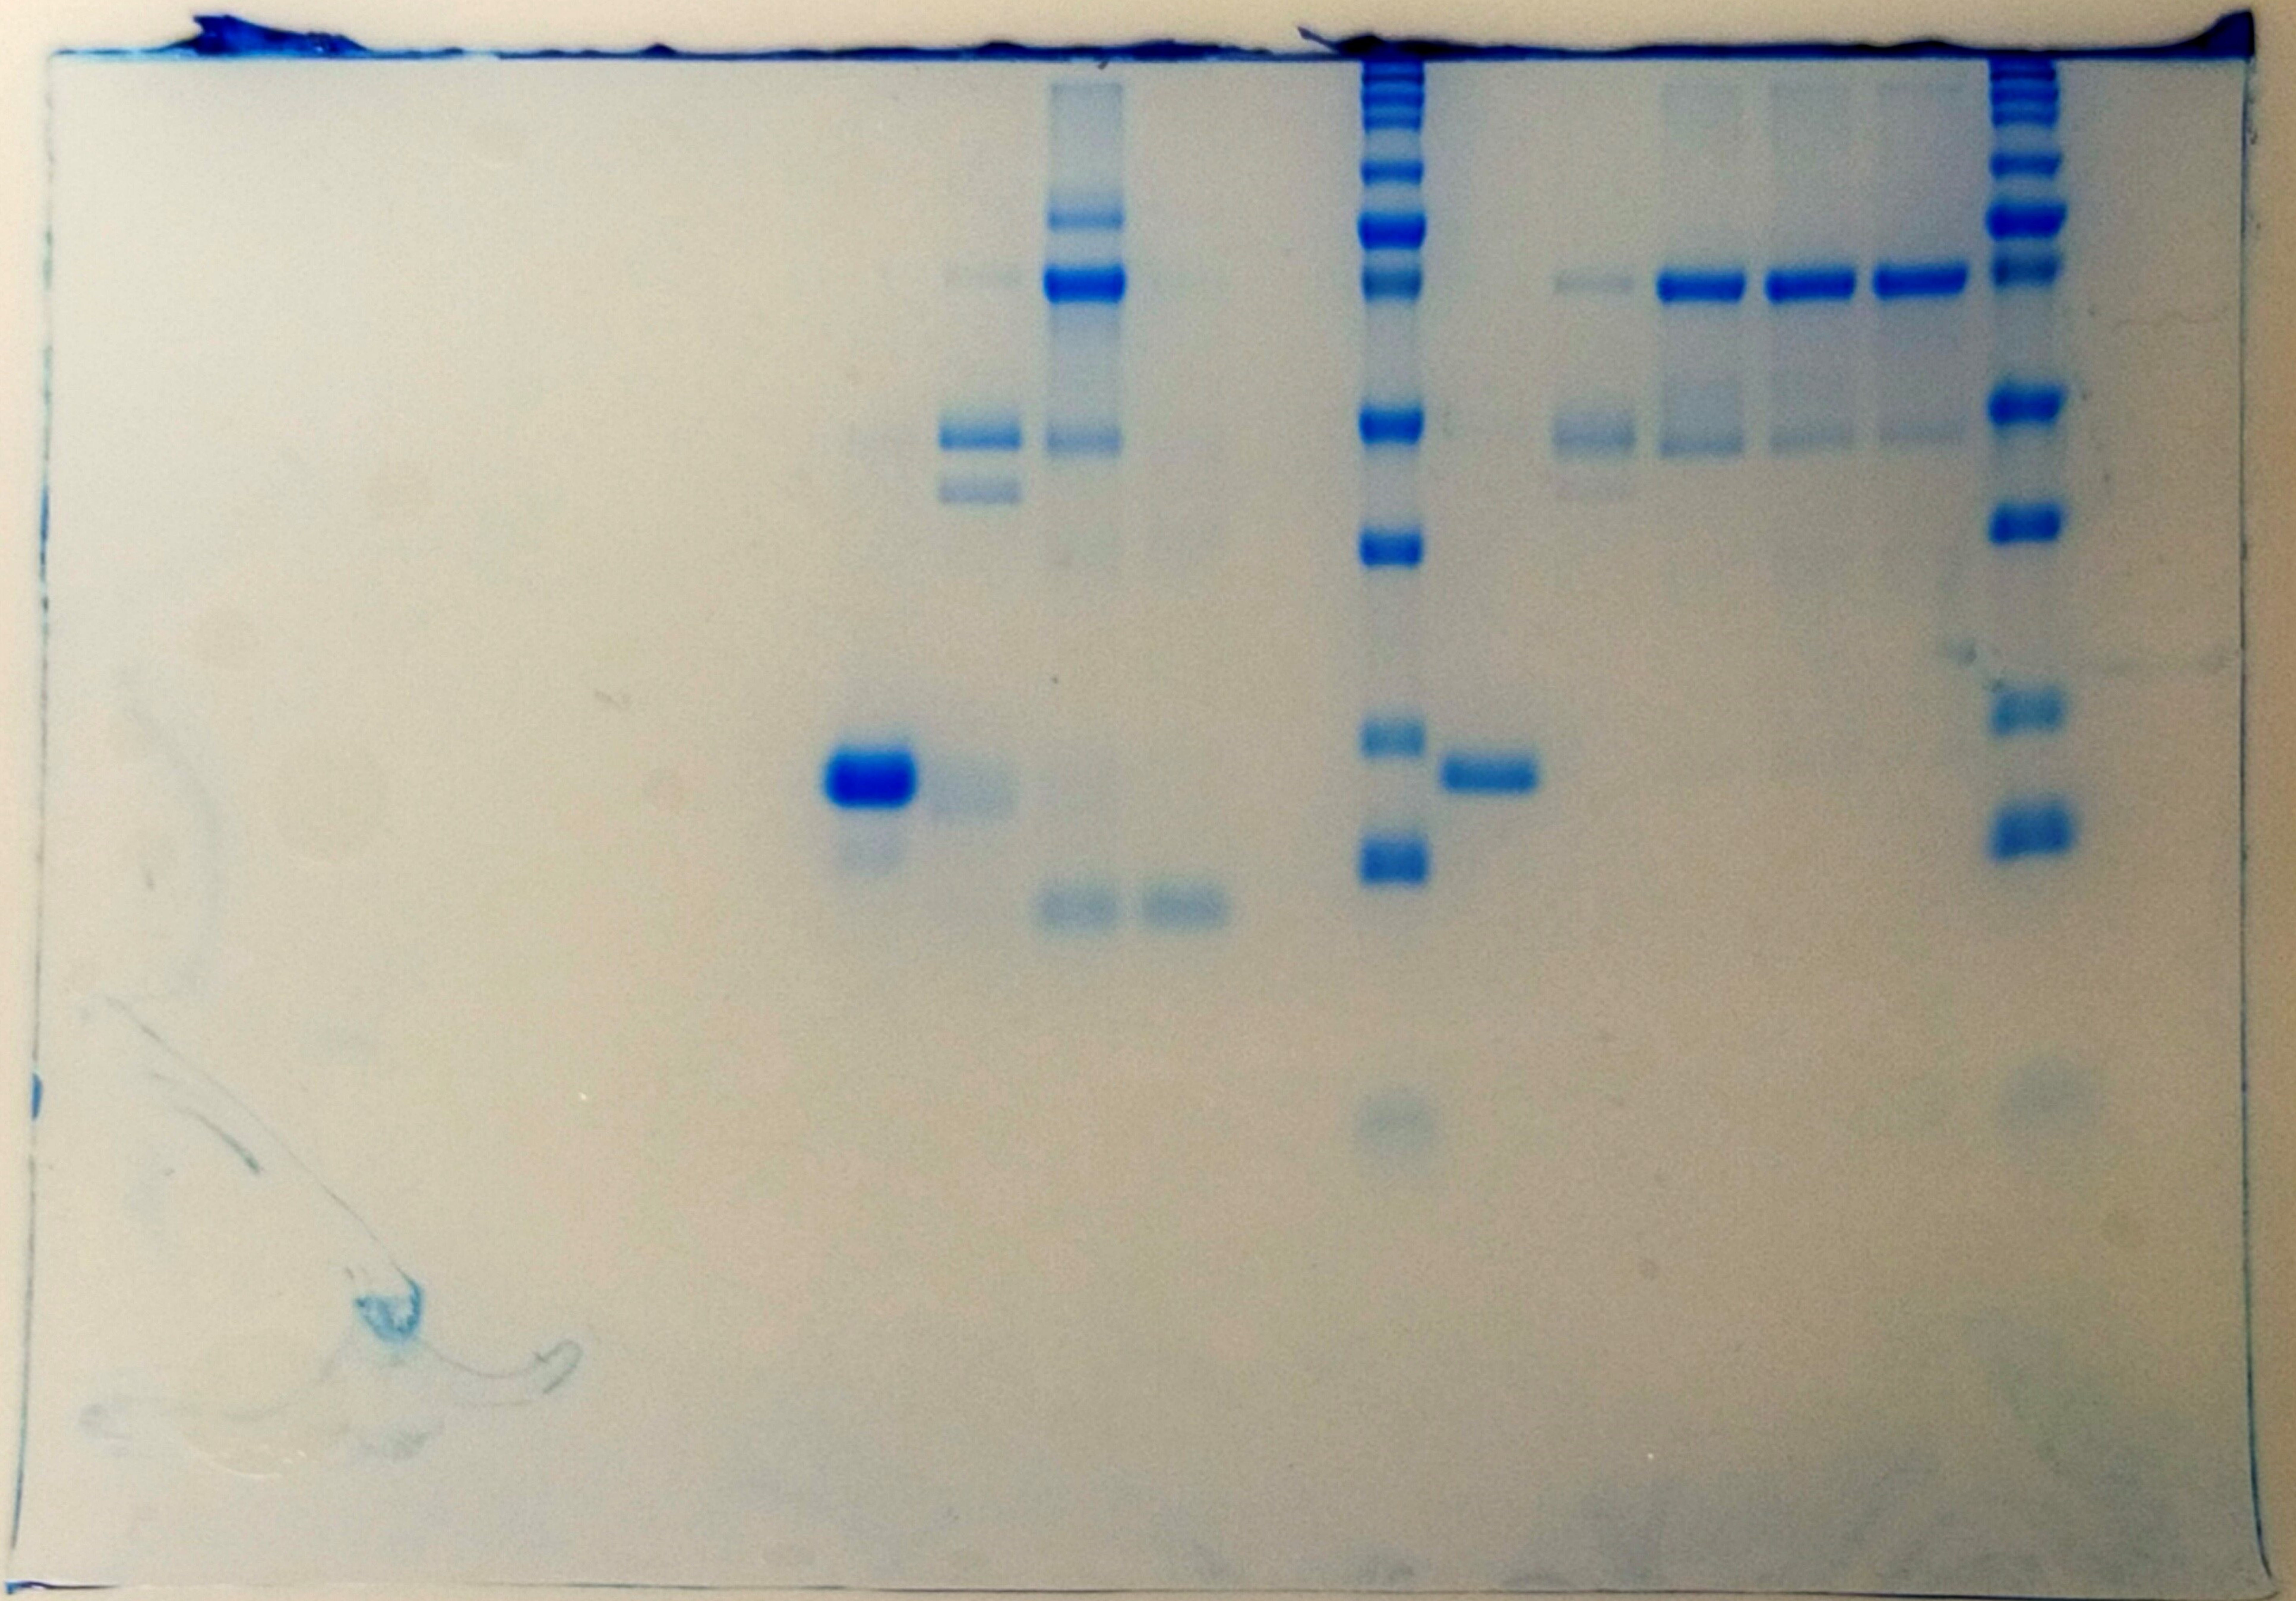



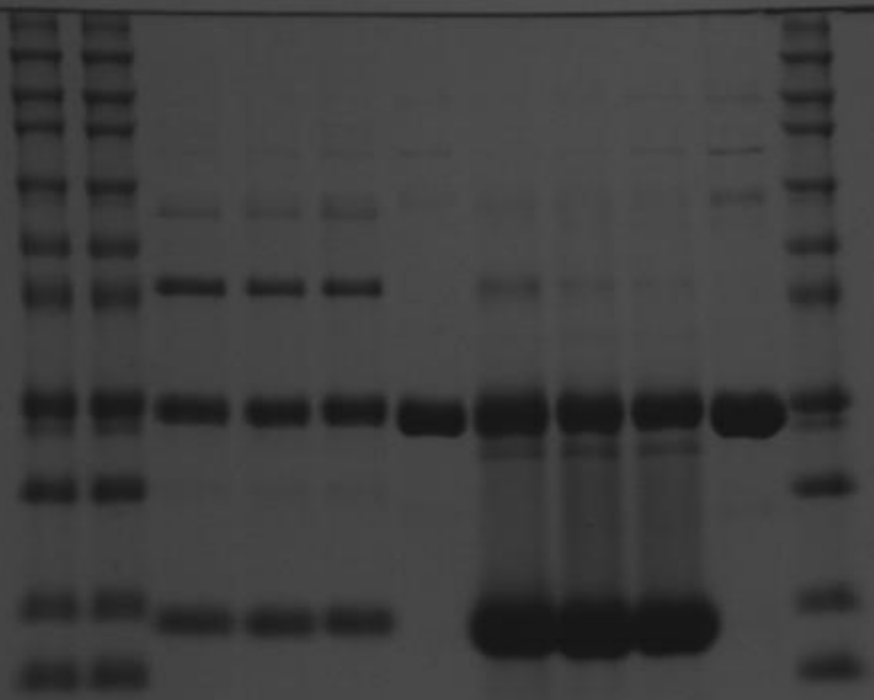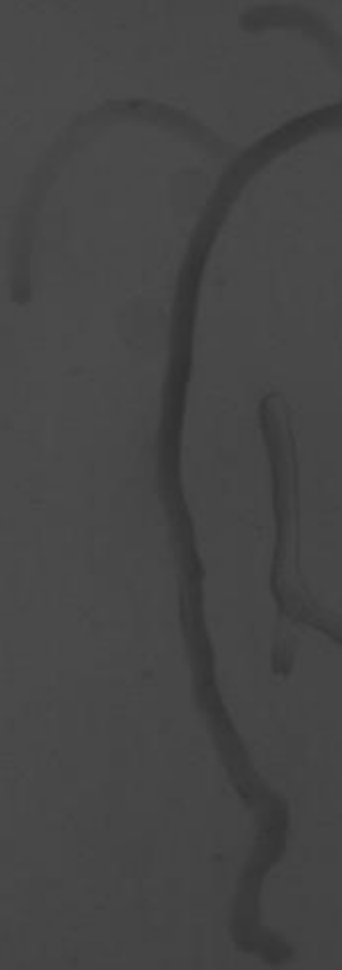

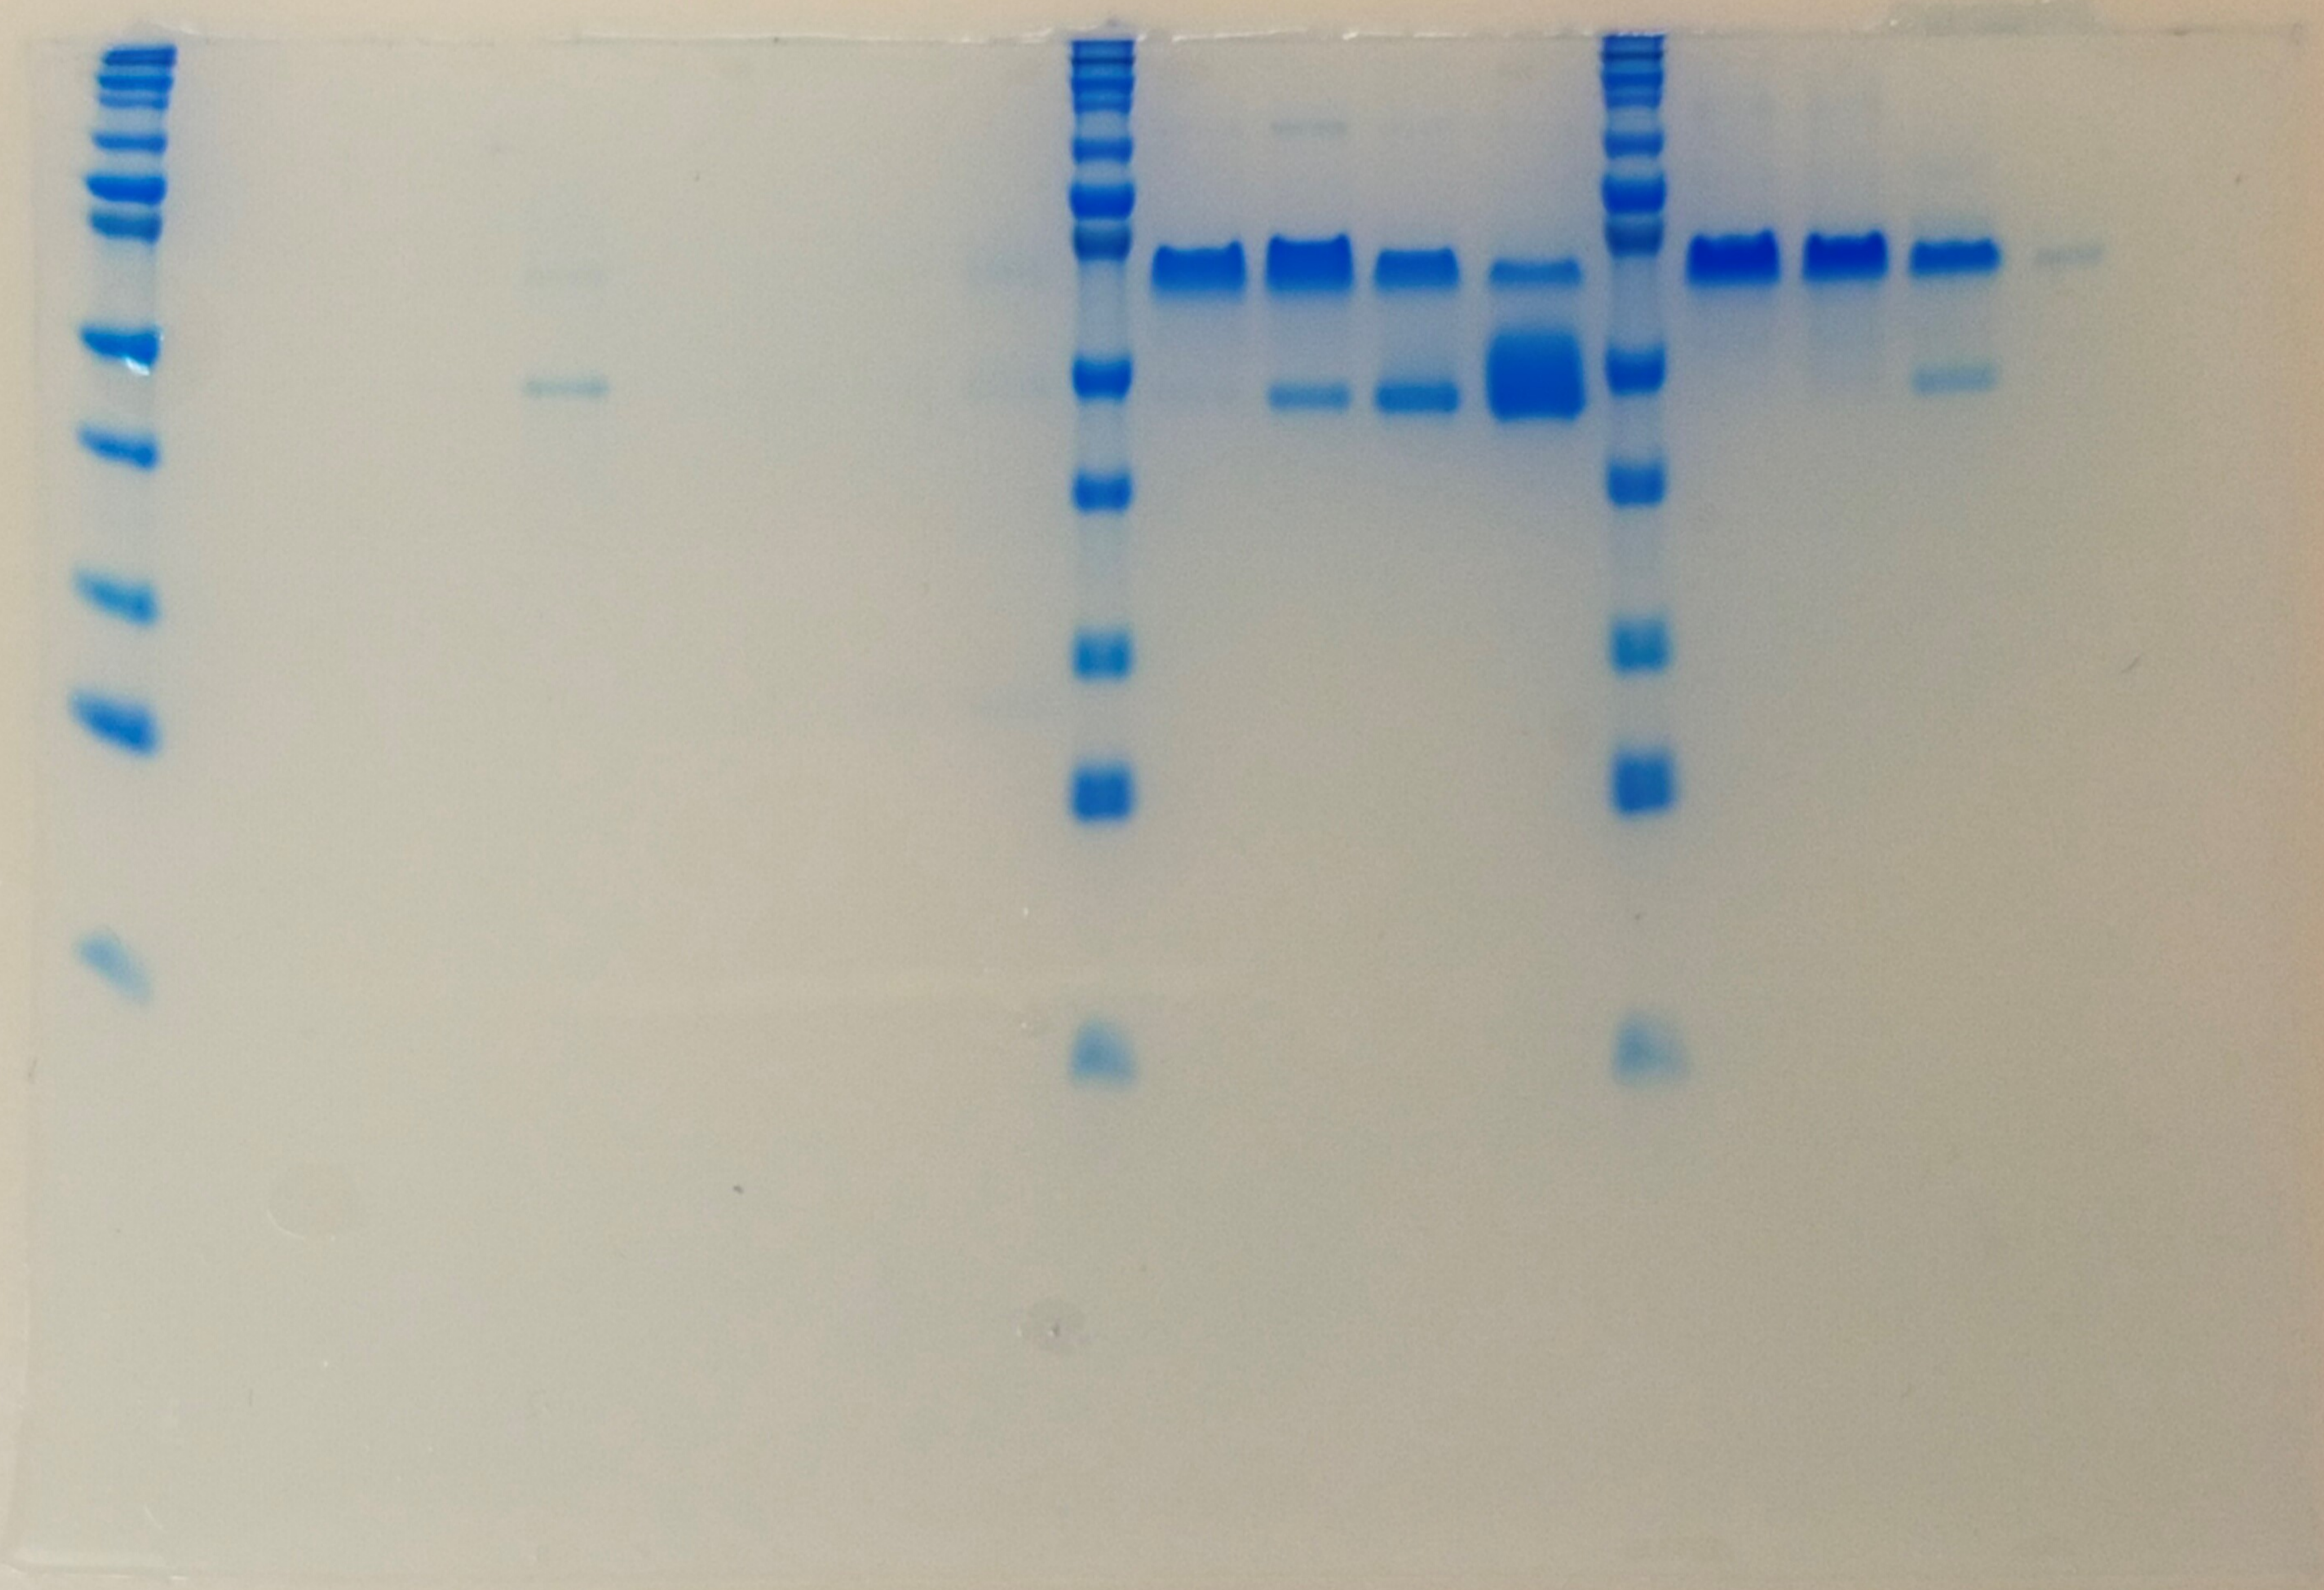

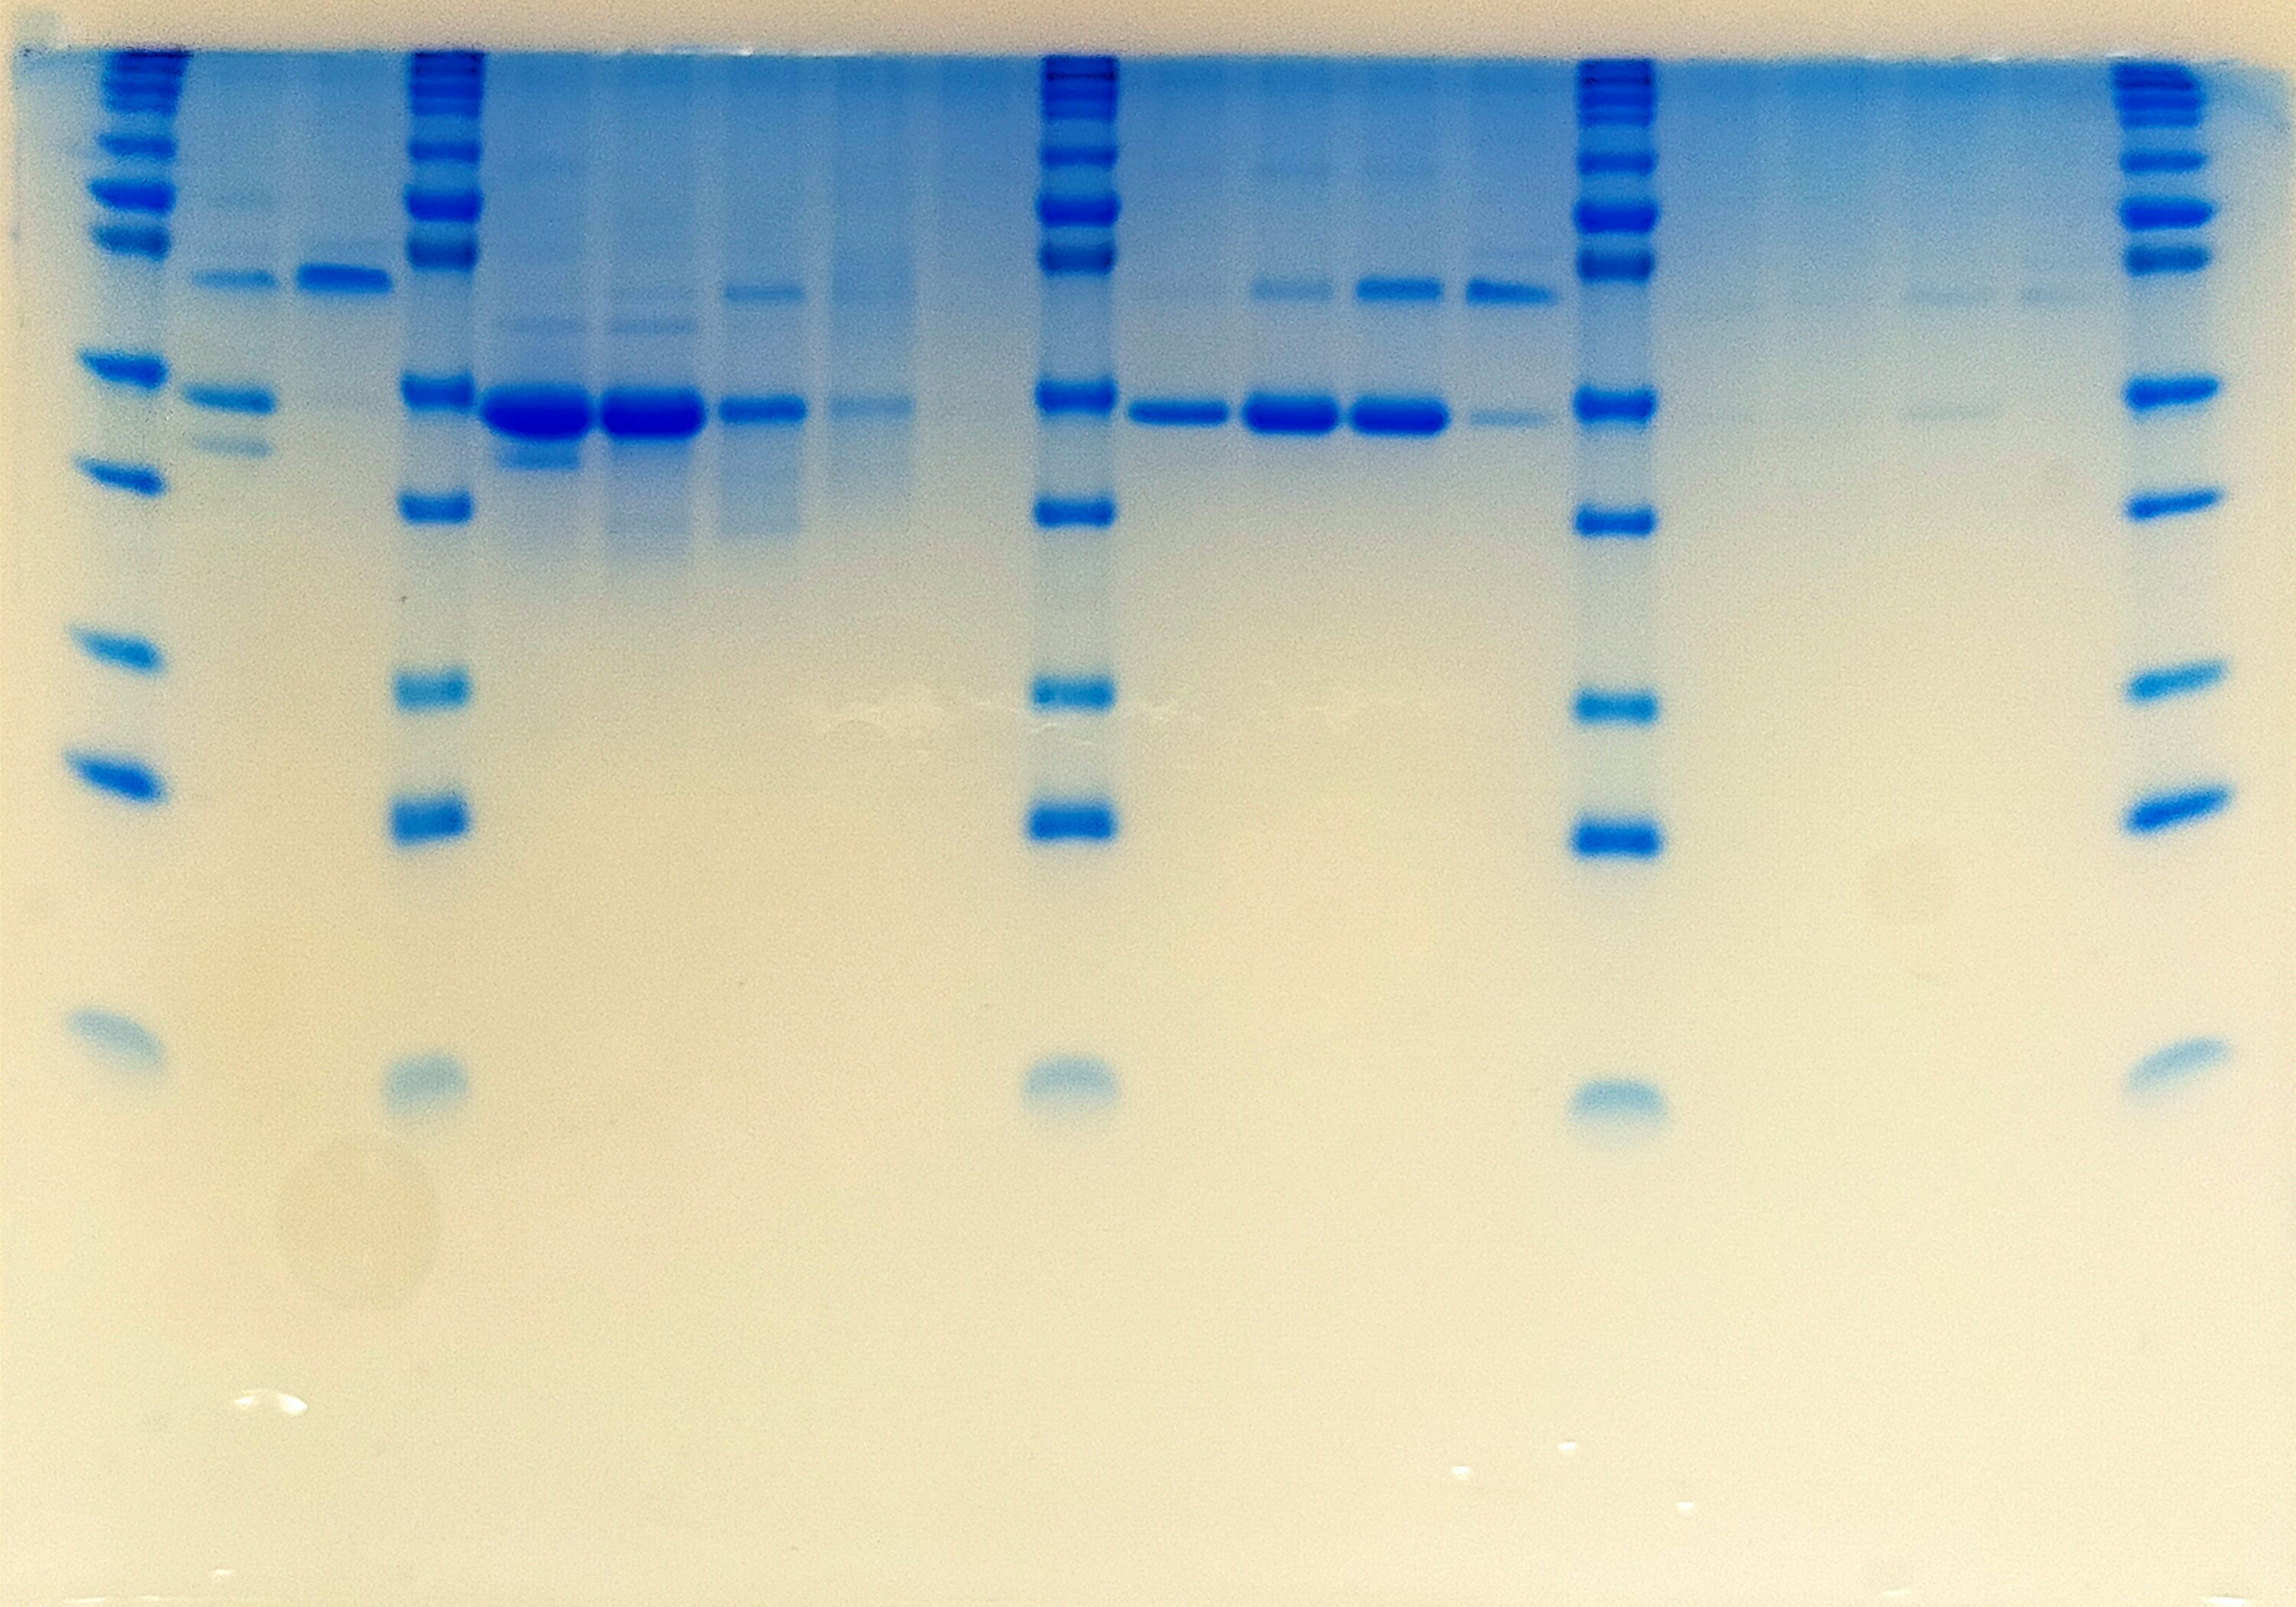

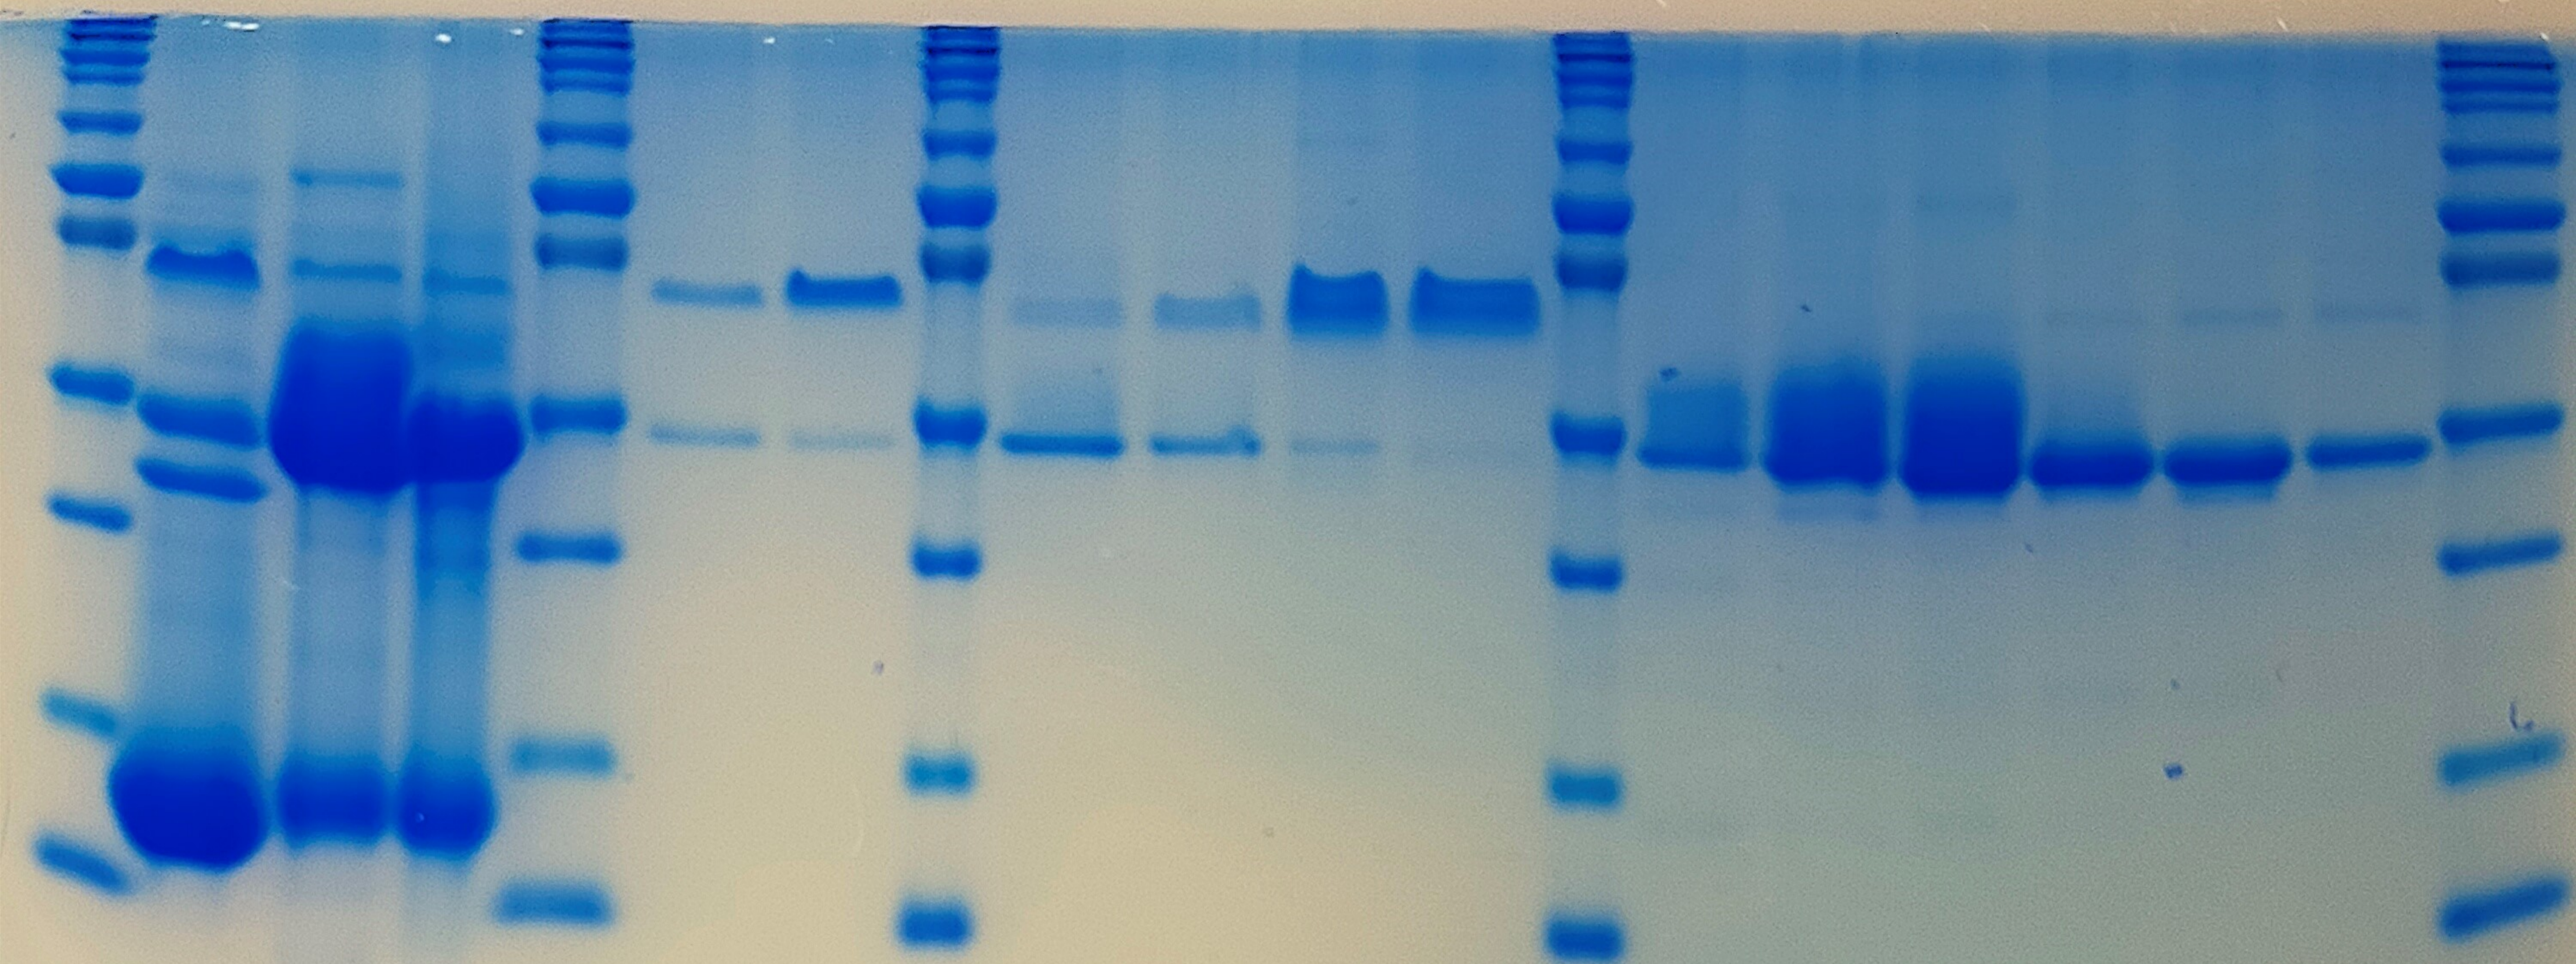



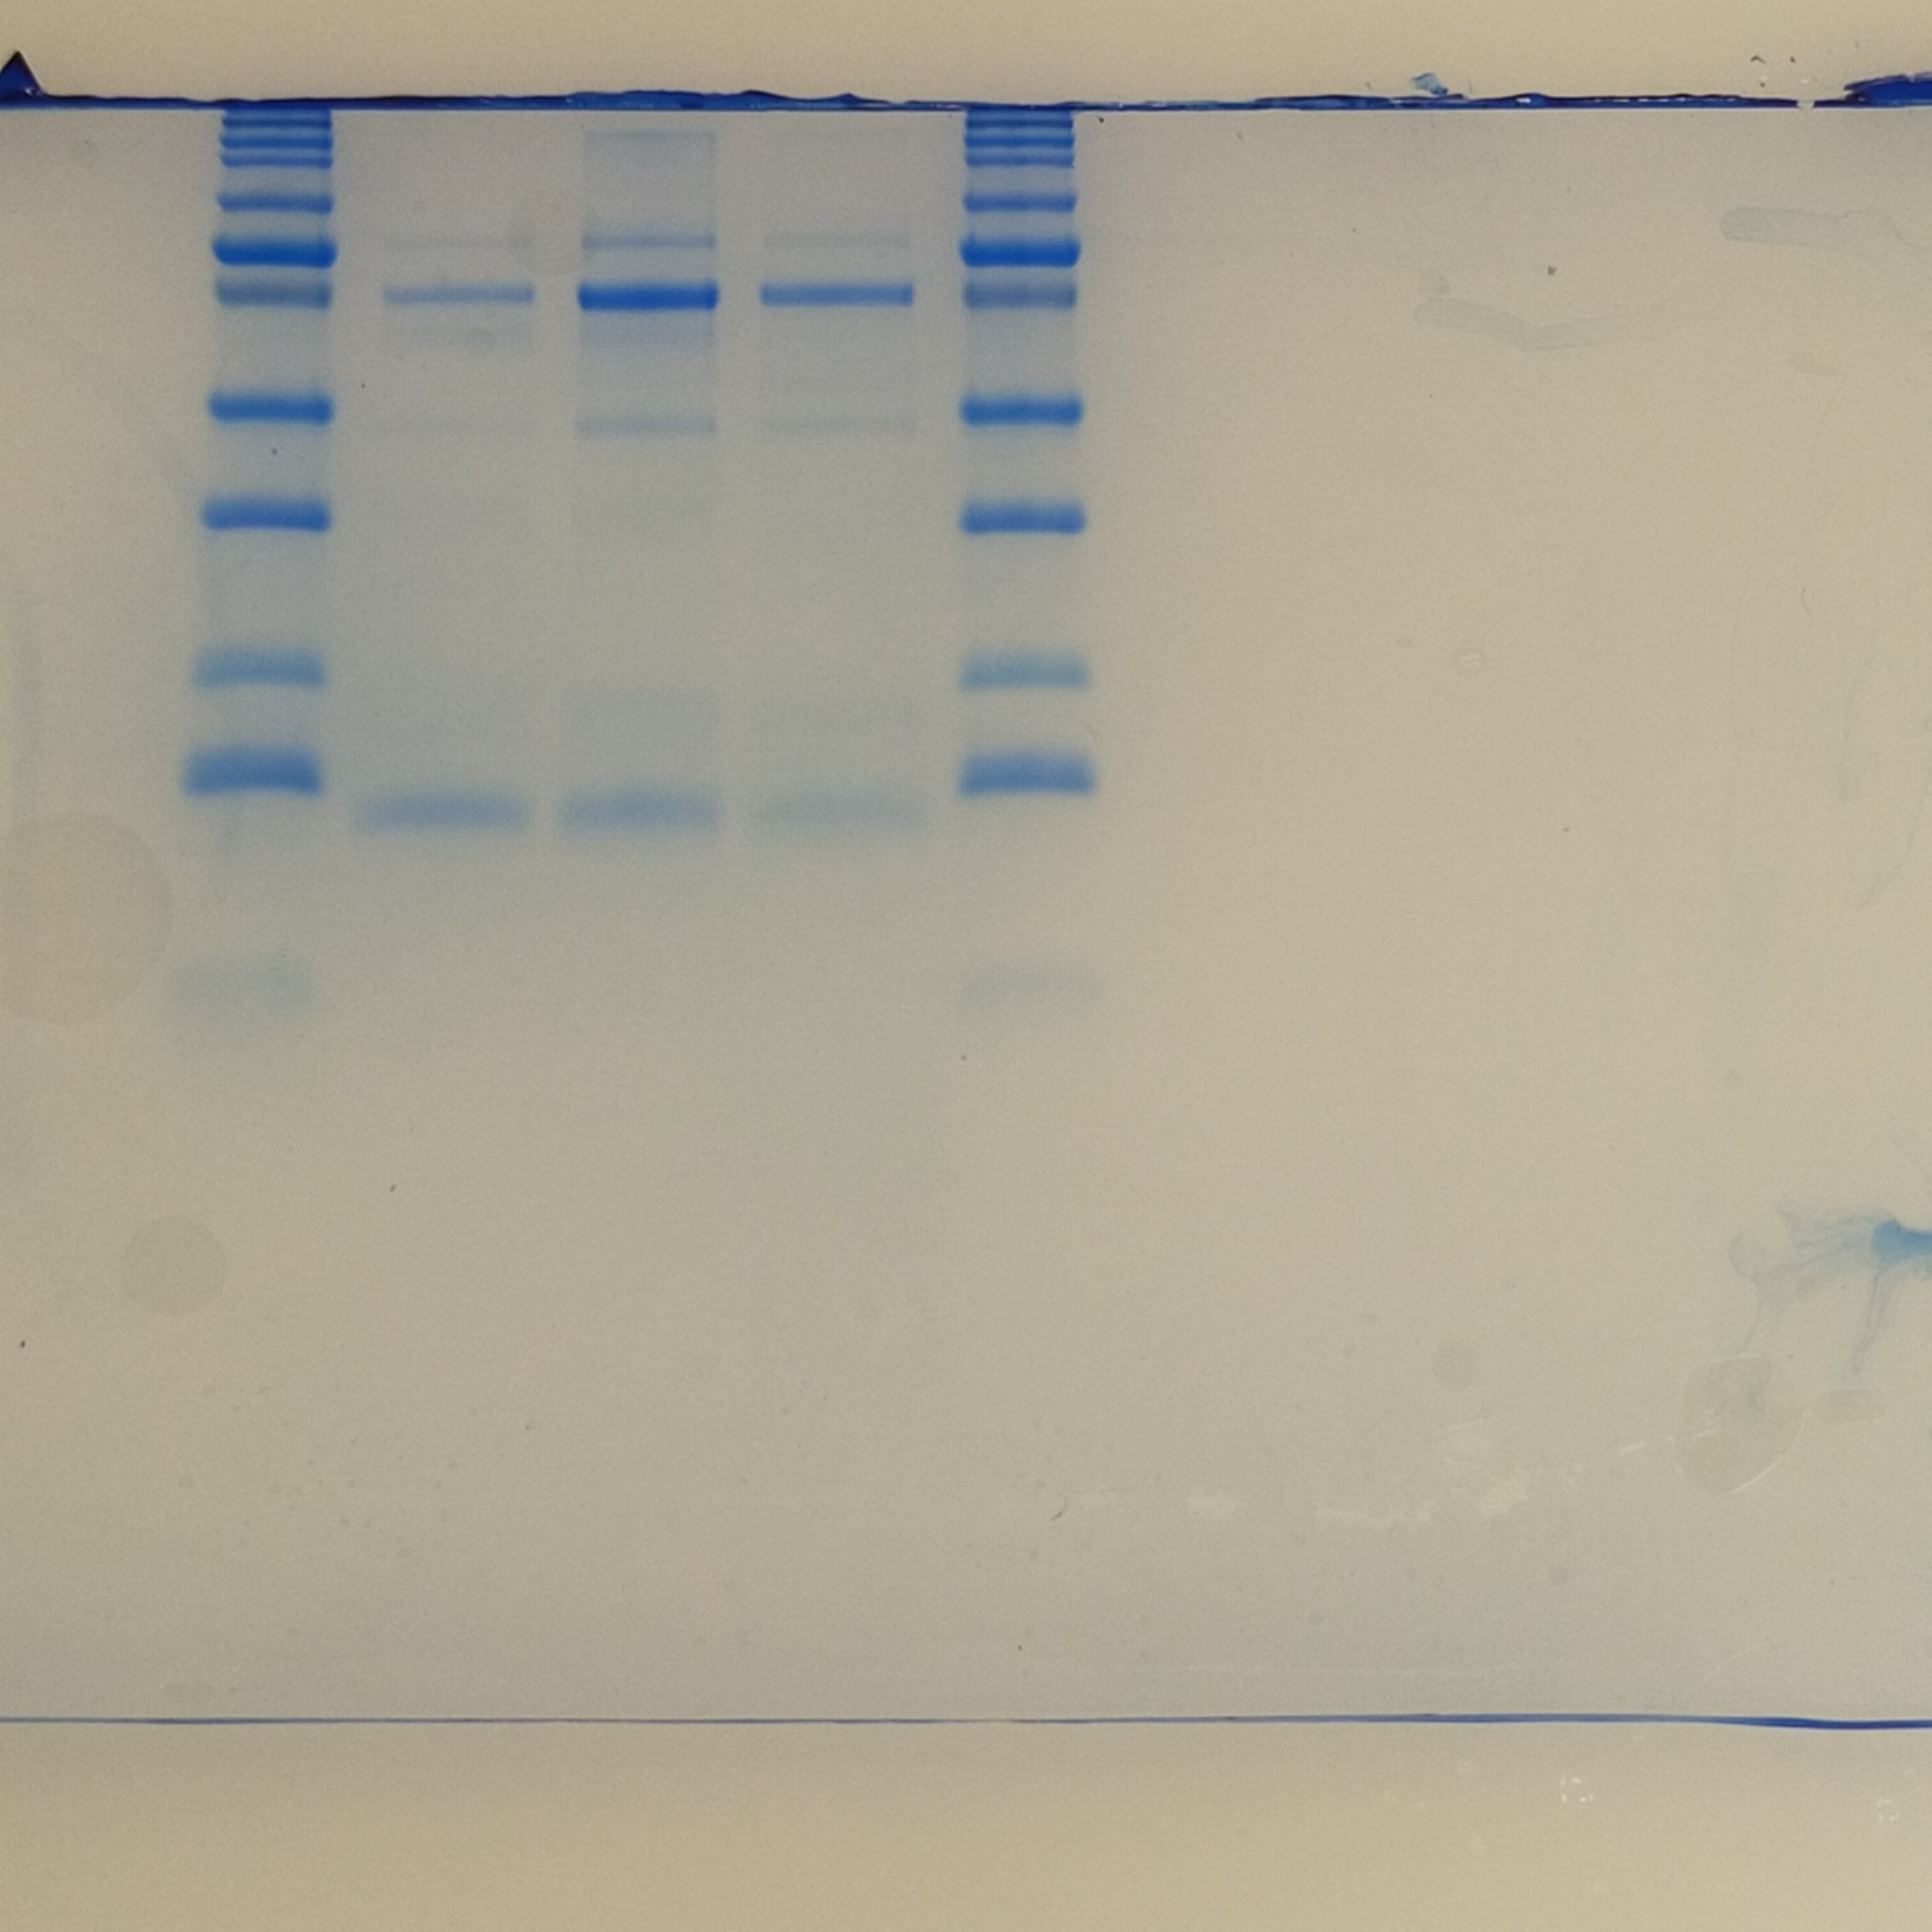

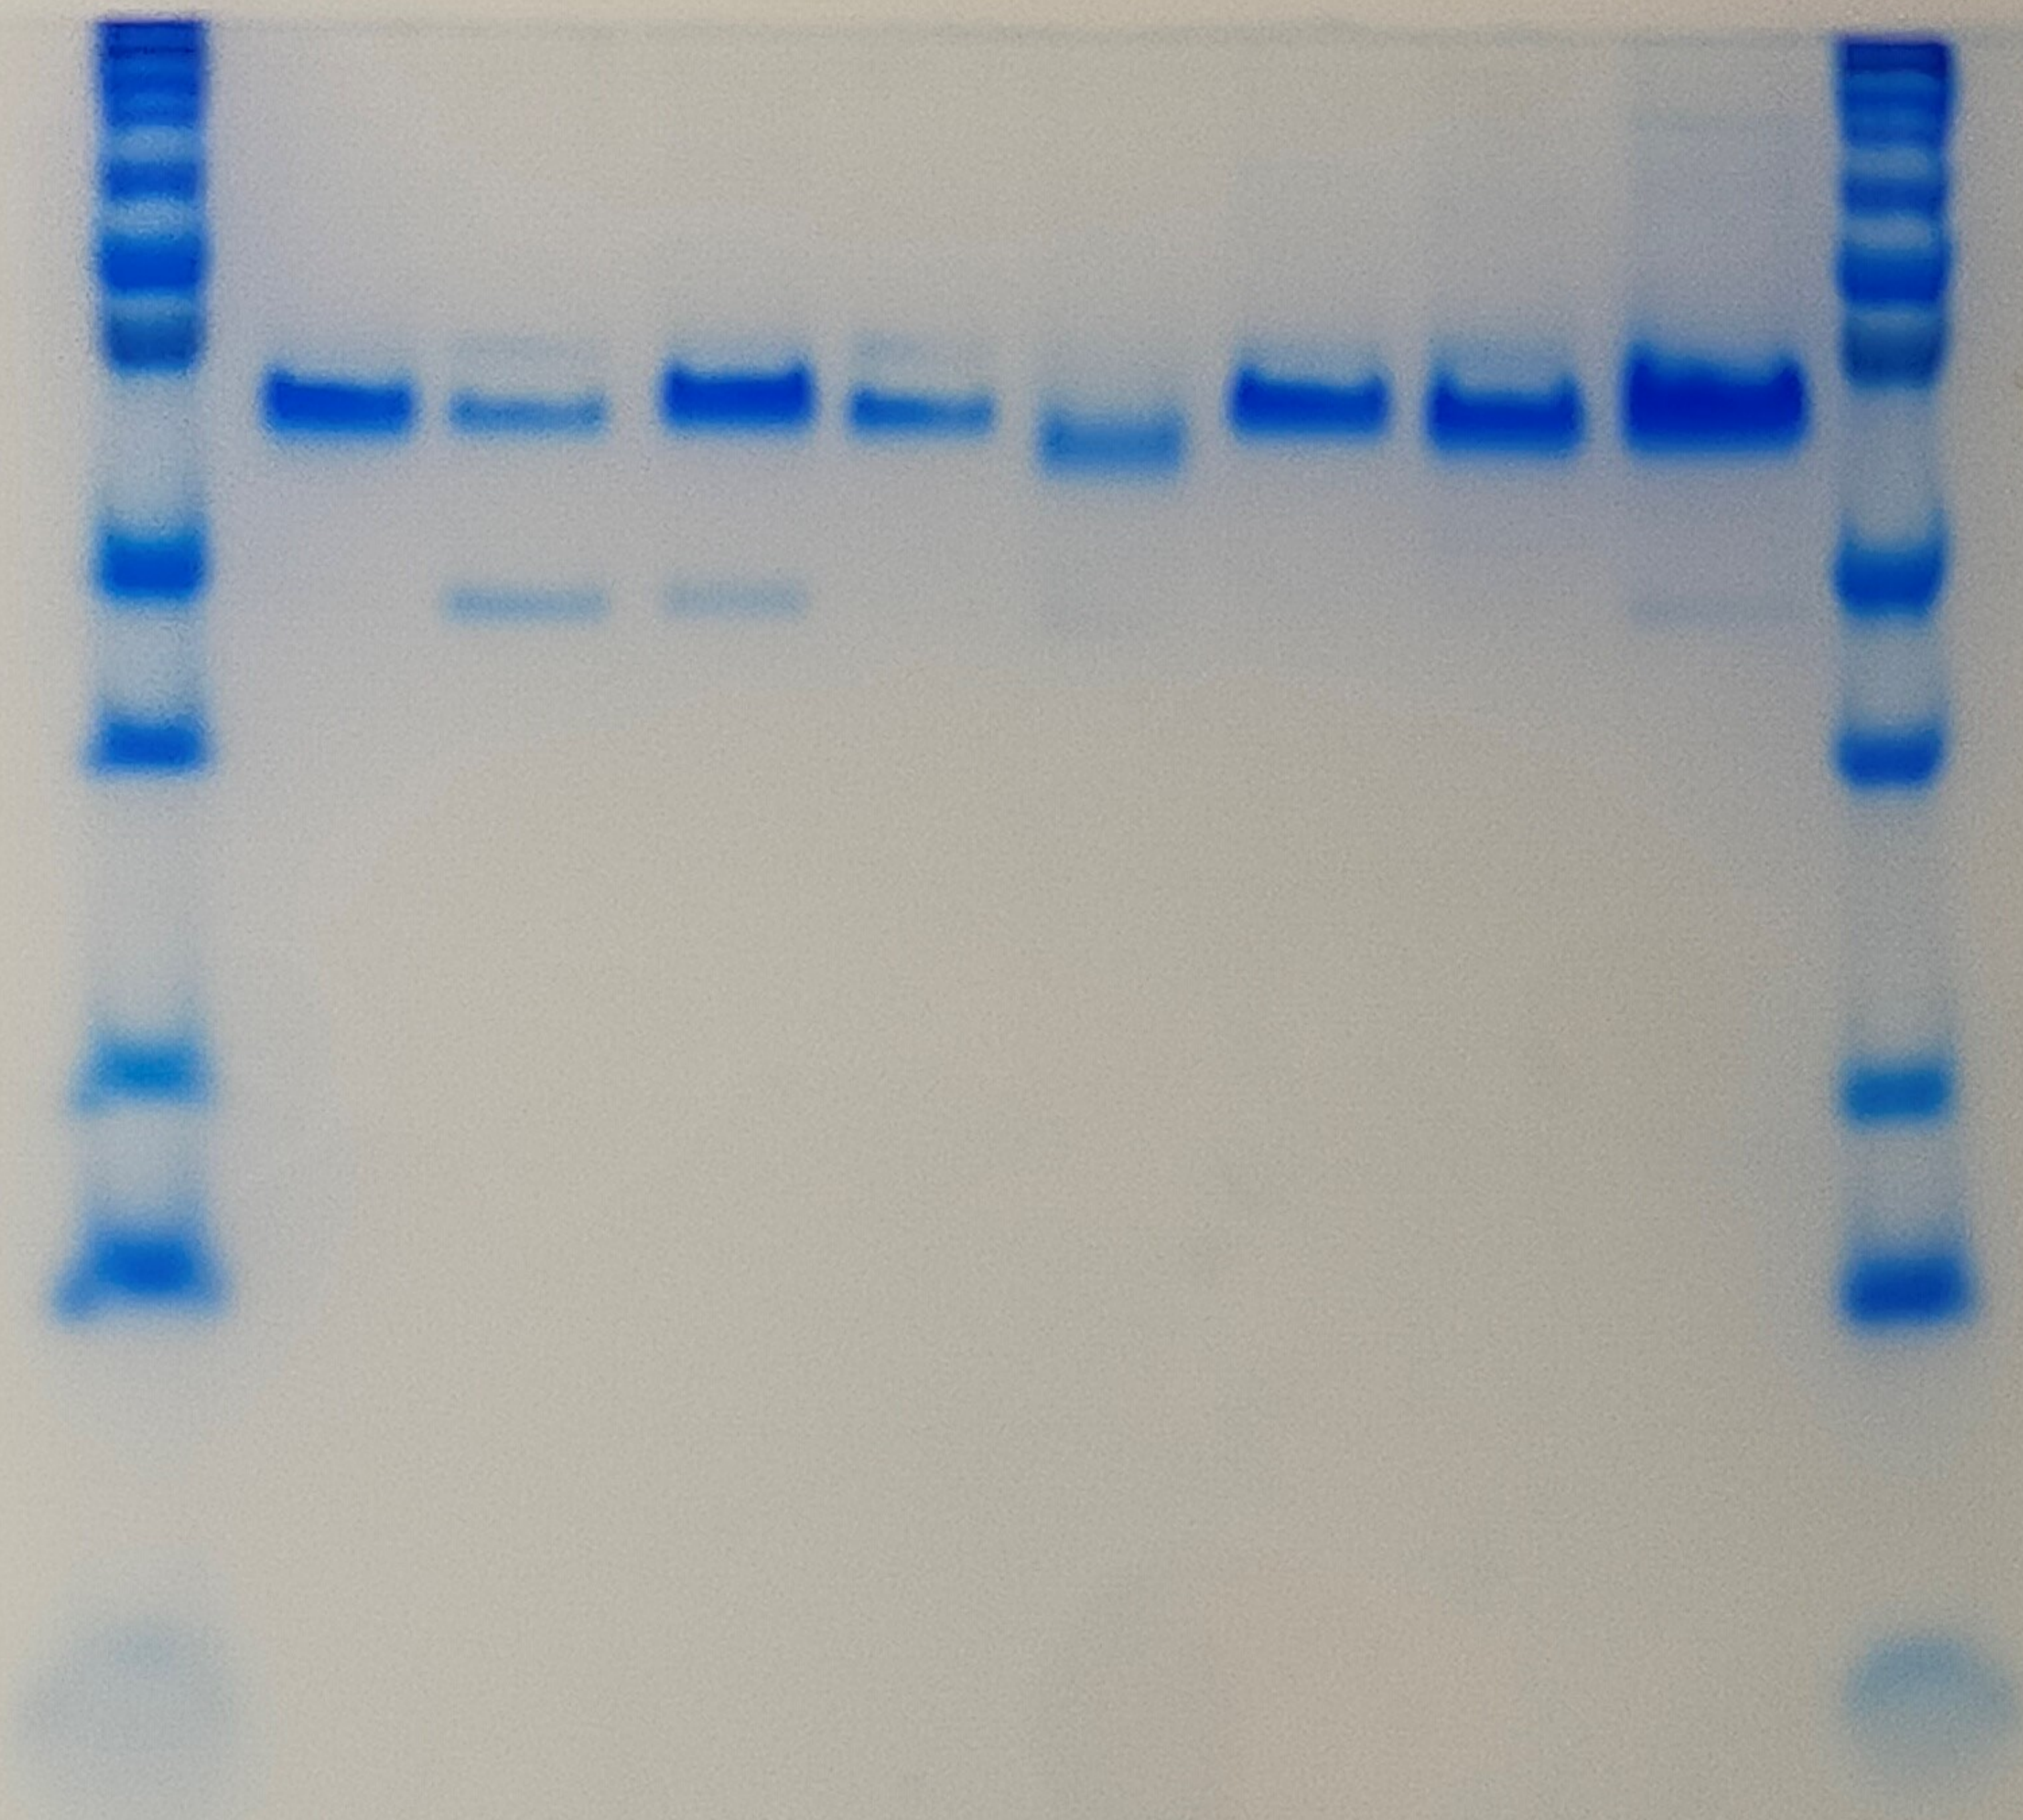

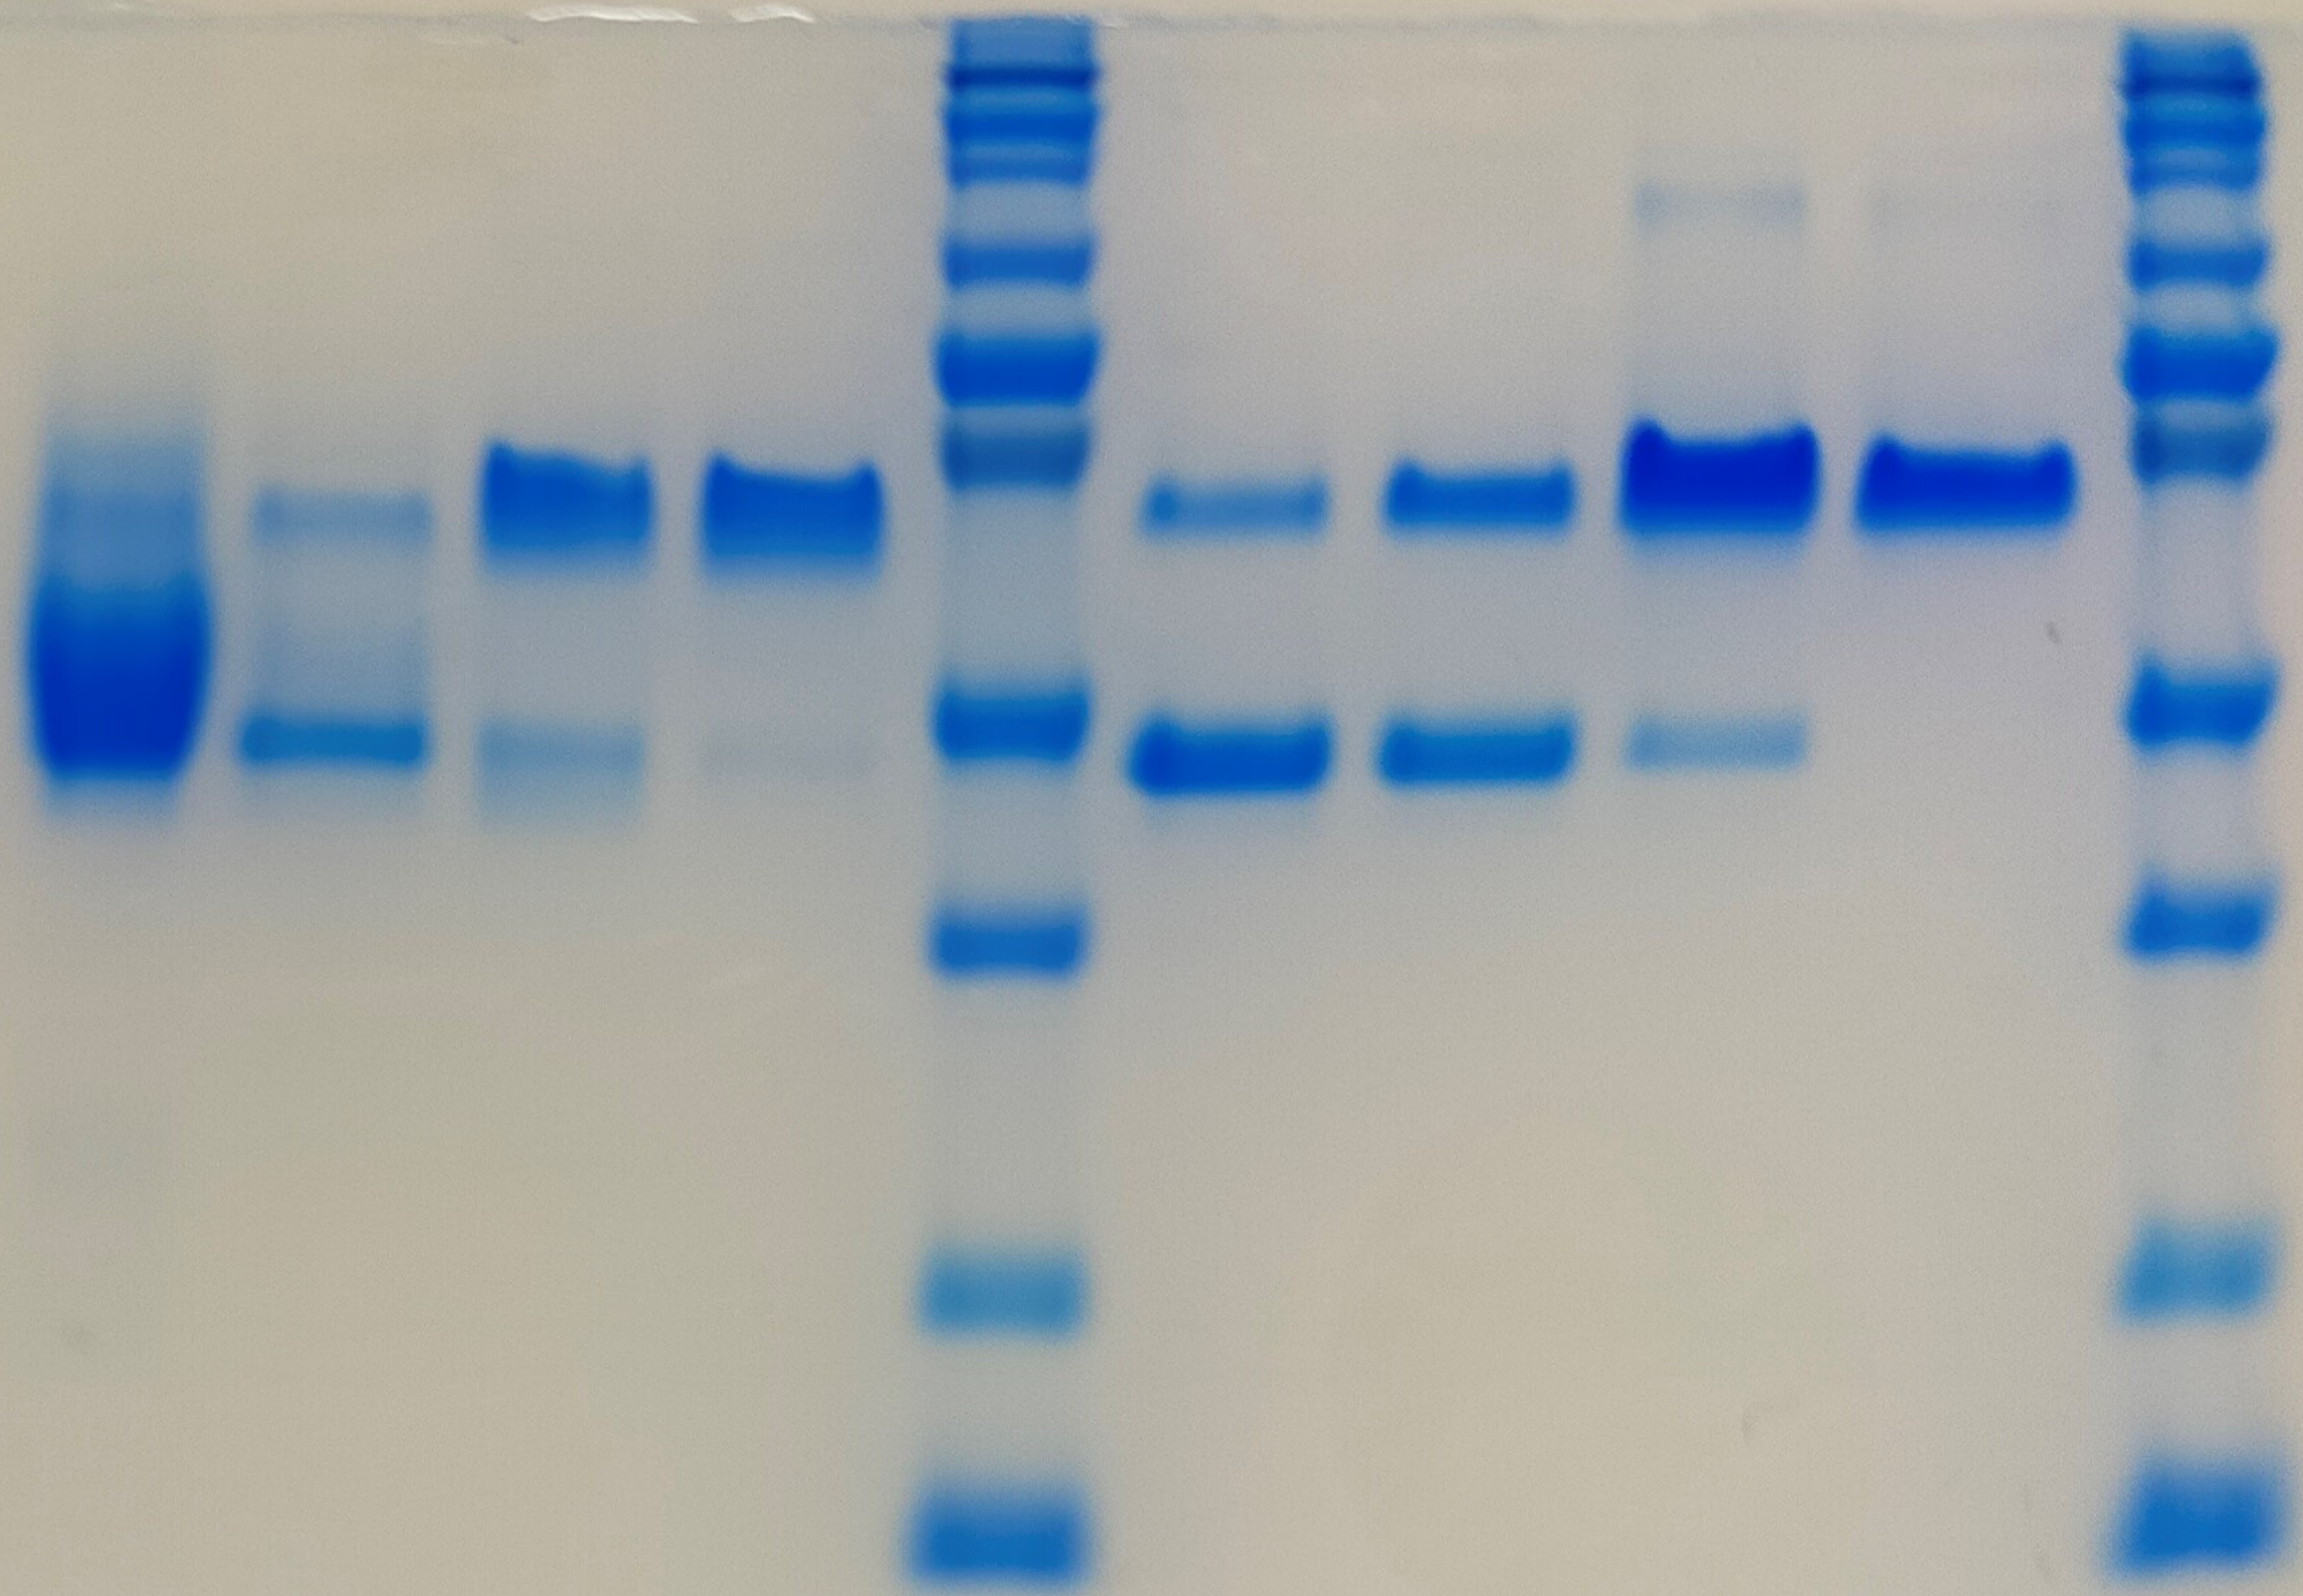

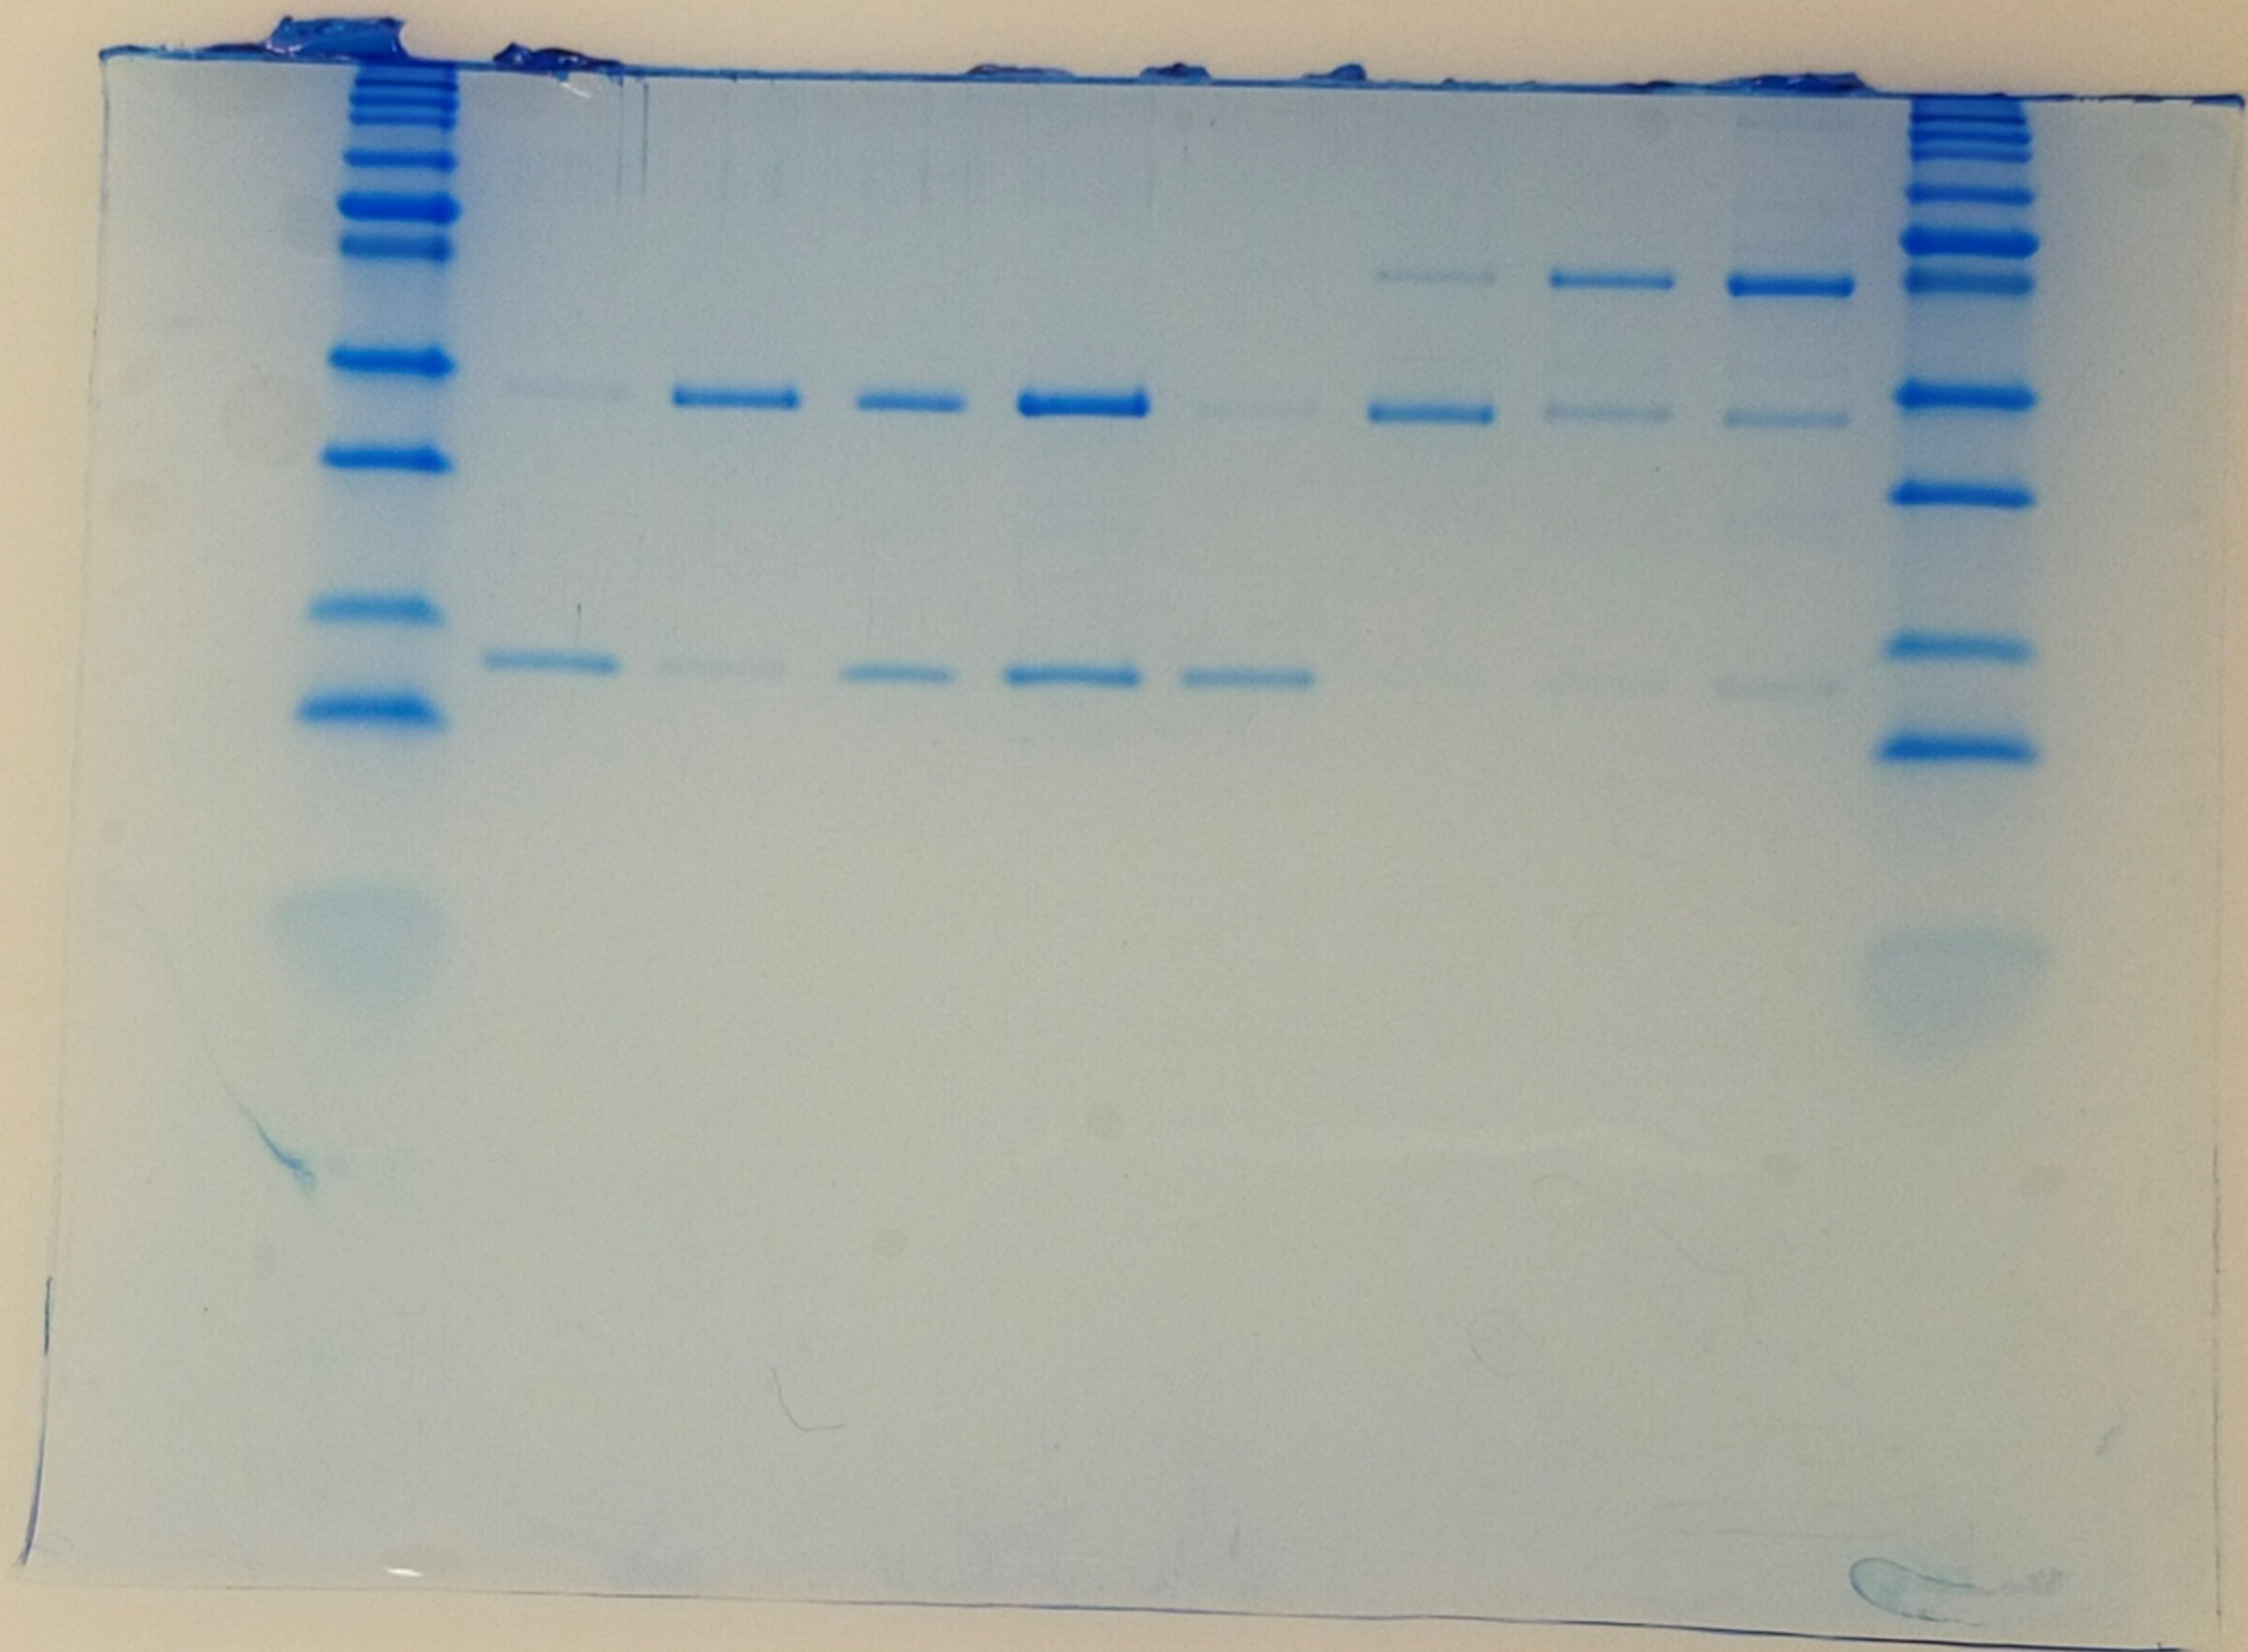

Supplement: RA-012-D2RA05249K-s001.pdf [file RA-012-D2RA05249K-s001.pdf]
